# Supplementary material for: A Human Skin Model Recapitulates Systemic Sclerosis Dermal Fibrosis and Identifies COL22A1 as a TGFβ Early Response Gene that Mediates Fibroblast to Myofibroblast Transition
Source: Genes (Basel). 2019 Jan 22;10(2):75. doi: 10.3390/genes10020075 (PMC6409682; doi:10.3390/genes10020075)
Supplement: Supplementary file 1 [file genes-10-00075-s001.zip › Supplementary Table S1.xlsx]

## Sheet: Supp Table
	Symbol	GeneID	Description	baseMean	log2FoldChange	lfcSE	stat	pvalue	padj	Fold Change
	COL22A1	169044	collagen, type XXII, alpha 1	289.885	3.19973	0.241409	13.2544	4.25532e-40	6.40469e-36	9.18787
	PMEPA1	56937	prostate transmembrane protein, androgen induced 1	7339.36	1.8126	0.143039	12.672	8.44988e-37	6.35896e-33	3.51274
	DPT	1805	dermatopontin	1131.18	2.22873	0.186351	11.9598	5.76719e-33	2.8934e-29	4.68722
	LTBP2	4053	latent transforming growth factor beta binding protein 2	5030.8	1.66932	0.14801	11.2784	1.67682e-29	6.30945e-26	3.18064
	COL1A1	1277	collagen, type I, alpha 1	17965.5	1.63803	0.152811	10.7193	8.26041e-27	2.48655e-23	3.1124
	FN1	2335	fibronectin 1	6901.77	1.76329	0.175778	10.0313	1.11005e-23	2.78456e-20	3.39472
	MMP10	4319	matrix metallopeptidase 10	2119.05	1.46295	0.178999	8.17297	3.0089e-16	6.46956e-13	2.75672
	COL3A1	1281	collagen, type III, alpha 1	19737.5	1.22349	0.155067	7.89009	3.01968e-15	5.68115e-12	2.33512
	DHRS2	10202	dehydrogenase/reductase (SDR family) member 2	75.457	2.18461	0.277756	7.8652	3.68502e-15	6.16259e-12	4.54604
	COL5A2	1290	collagen, type V, alpha 2	2224.31	1.23657	0.158309	7.8111	5.66927e-15	8.53282e-12	2.35637
	ITGB6	3694	integrin, beta 6	2663.8	1.55611	0.20171	7.71457	1.21386e-14	1.66089e-11	2.94059
	ADAMTS15	170689	ADAM metallopeptidase with thrombospondin type 1 motif, 15	236.704	1.82809	0.237885	7.68478	1.53264e-14	1.77444e-11	3.55067
	LRRC15	131578	leucine rich repeat containing 15	255.002	2.05994	0.267937	7.68815	1.49282e-14	1.77444e-11	4.16968
	TGFBI	7045	transforming growth factor, beta-induced, 68kDa	28907.7	1.64162	0.2185	7.51315	5.77216e-14	6.20549e-11	3.12016
	MKI67	4288	marker of proliferation Ki-67	1449.3	-1.35583	0.181188	-7.483	7.2643e-14	7.289e-11	-2.55944
	COL1A2	1278	collagen, type I, alpha 2	12748.7	1.07431	0.144222	7.449	9.40529e-14	8.84744e-11	2.10572
	ADAM12	8038	ADAM metallopeptidase domain 12	737.227	1.43659	0.197386	7.2781	3.38563e-13	2.99748e-10	2.70681
	GLS	2744	glutaminase	3630.24	1.05586	0.145303	7.26659	3.68669e-13	3.08269e-10	2.07895
	MIAT	440823	myocardial infarction associated transcript (non-protein coding)	2709.66	1.69227	0.233493	7.24764	4.2409e-13	3.35946e-10	3.23166
	C4orf26	152816	chromosome 4 open reading frame 26	87.3071	2.02374	0.279836	7.23187	4.76403e-13	3.58517e-10	4.06636
	WNT5B	81029	wingless-type MMTV integration site family, member 5B	578.956	1.83839	0.25954	7.08326	1.40797e-12	1.00911e-09	3.5761
	KRT77	374454	keratin 77, type II	4344.93	1.12953	0.163702	6.89987	5.20493e-12	3.56088e-09	2.18787
	CXCL14	9547	chemokine (C-X-C motif) ligand 14	13661	1.3824	0.203681	6.78709	1.14422e-11	7.48765e-09	2.60702
	TPST1	8460	tyrosylprotein sulfotransferase 1	842.843	1.36724	0.202301	6.75845	1.3948e-11	8.74713e-09	2.57976
	COL15A1	1306	collagen, type XV, alpha 1	4379.12	1.45866	0.216801	6.7281	1.71898e-11	1.0349e-08	2.74852
	SNAI1	6615	snail family zinc finger 1	478.162	1.40783	0.209456	6.72139	1.80003e-11	1.04201e-08	2.65338
	NKD1	85407	naked cuticle homolog 1 (Drosophila)	567.859	1.7701	0.269002	6.58025	4.69649e-11	2.61803e-08	3.41078
	LDLRAD4	753	low density lipoprotein receptor class A domain containing 4	536.769	1.72128	0.272471	6.31728	2.66208e-10	1.43096e-07	3.29728
	NPR3	4883	natriuretic peptide receptor 3	453.499	1.56599	0.248223	6.30882	2.8118e-10	1.45932e-07	2.96081
	DHRS9	10170	dehydrogenase/reductase (SDR family) member 9	582.292	-1.28473	0.204396	-6.28551	3.26782e-10	1.63947e-07	-2.43637
	COL5A1	1289	collagen, type V, alpha 1	3619.8	1.07624	0.172581	6.23613	4.4853e-10	2.10992e-07	2.10853
	ESM1	11082	endothelial cell-specific molecule 1	465.973	1.50308	0.241029	6.23611	4.48591e-10	2.10992e-07	2.83448
	DIRAS1	148252	DIRAS family, GTP-binding RAS-like 1	376.723	1.32961	0.213527	6.22691	4.75724e-10	2.16973e-07	2.51335
	DLGAP5	9787	discs, large (Drosophila) homolog-associated protein 5	259.788	-1.40896	0.229653	-6.13515	8.50803e-10	3.7663e-07	-2.65545
	RRM2	6241	ribonucleotide reductase M2	877.572	-1.30036	0.216333	-6.01093	1.84458e-09	7.85076e-07	-2.46291
	TPM1	7168	tropomyosin 1 (alpha)	2582.4	1.35243	0.225103	6.00804	1.8778e-09	7.85076e-07	2.55341
	VCAN	1462	versican	1145.71	1.27292	0.212529	5.98941	2.10601e-09	8.5669e-07	2.4165
	CENPF	1063	centromere protein F, 350/400kDa	512.171	-1.34409	0.225067	-5.97196	2.34419e-09	9.28483e-07	-2.5387
	CEP55	55165	centrosomal protein 55kDa	313.454	-1.31851	0.22519	-5.85509	4.7676e-09	1.83805e-06	-2.49408
	SOX9	6662	SRY (sex determining region Y)-box 9	2559.63	0.945183	0.161541	5.85105	4.88487e-09	1.83805e-06	1.92543
	HECW2	57520	HECT, C2 and WW domain containing E3 ubiquitin protein ligase 2	196.792	1.3868	0.237928	5.82867	5.58725e-09	2.00223e-06	2.61499
	PRSS23	11098	protease, serine, 23	2582.35	1.28477	0.220359	5.83036	5.53065e-09	2.00223e-06	2.43644
	SPRR2D	6703	small proline-rich protein 2D	8671.6	-0.832494	0.143708	-5.79297	6.91517e-09	2.42047e-06	-1.78076
	GADD45B	4616	growth arrest and DNA-damage-inducible, beta	1938.17	0.986971	0.171032	5.7707	7.89446e-09	2.70044e-06	1.98202
	KIF4A	24137	kinesin family member 4A	251.989	-1.35197	0.234771	-5.75866	8.47833e-09	2.83572e-06	-2.5526
	CACNA1C	775	calcium channel, voltage-dependent, L type, alpha 1C subunit	382.538	1.42506	0.247698	5.75319	8.7575e-09	2.86542e-06	2.68525
	LARP6	55323	La ribonucleoprotein domain family, member 6	1040.46	1.15769	0.202853	5.70704	1.1496e-08	3.68141e-06	2.231
	MMP13	4322	matrix metallopeptidase 13	329.708	1.59513	0.280012	5.69665	1.22184e-08	3.83125e-06	3.02122
	FGFBP2	83888	fibroblast growth factor binding protein 2	241.26	1.55177	0.275064	5.64149	1.68581e-08	5.1782e-06	2.93177
	TOP2A	7153	topoisomerase (DNA) II alpha 170kDa	920.409	-1.24224	0.221567	-5.60661	2.06329e-08	6.21092e-06	-2.36565
	DNAH17	8632	dynein, axonemal, heavy chain 17	2511.43	0.988817	0.177336	5.57595	2.4618e-08	7.2652e-06	1.98456
	IL11	3589	interleukin 11	3108.15	1.42155	0.256437	5.54347	2.96543e-08	8.58322e-06	2.67873
	EREG	2069	epiregulin	673.266	-1.10915	0.200548	-5.53063	3.19089e-08	9.06152e-06	-2.15719
	PHLDB1	23187	pleckstrin homology-like domain, family B, member 1	4513.93	0.961555	0.174179	5.52049	3.3805e-08	9.42221e-06	1.94741
	IQGAP3	128239	IQ motif containing GTPase activating protein 3	796.542	-1.2758	0.2315	-5.511	3.56808e-08	9.76422e-06	-2.42133
	A2ML1	144568	alpha-2-macroglobulin-like 1	4405.33	-0.880735	0.159943	-5.50656	3.65904e-08	9.83432e-06	-1.84131
	NDC80	10403	NDC80 kinetochore complex component	201.914	-1.3637	0.248117	-5.49619	3.88085e-08	1.02475e-05	-2.57344
	TROAP	10024	trophinin associated protein	550.024	-1.2914	0.236266	-5.46585	4.60696e-08	1.19551e-05	-2.44765
	CDCA8	55143	cell division cycle associated 8	373.454	-1.16273	0.213966	-5.43417	5.50534e-08	1.40442e-05	-2.2388
	TRIP13	9319	thyroid hormone receptor interactor 13	260.821	-1.22026	0.226908	-5.37777	7.54152e-08	1.89179e-05	-2.32989
	GPRC5A	9052	G protein-coupled receptor, class C, group 5, member A	746.005	1.24304	0.232412	5.34844	8.87172e-08	2.18899e-05	2.36697
	ARL15	54622	ADP-ribosylation factor-like 15	586.048	1.2156	0.228455	5.32098	1.03209e-07	2.50548e-05	2.32238
	CDC20	991	cell division cycle 20	786.928	-1.30947	0.24681	-5.30556	1.12329e-07	2.68359e-05	-2.4785
	BIRC5	332	baculoviral IAP repeat containing 5	761.416	-1.22948	0.231877	-5.30231	1.14344e-07	2.68904e-05	-2.34483
	LYPD1	116372	LY6/PLAUR domain containing 1	41.5545	1.4689	0.27761	5.29123	1.21494e-07	2.81324e-05	2.7681
	DCLK3	85443	doublecortin-like kinase 3	106.645	1.47714	0.279628	5.28252	1.27416e-07	2.90567e-05	2.78397
	AURKB	9212	aurora kinase B	554.1	-1.18723	0.224872	-5.27957	1.29487e-07	2.90881e-05	-2.27715
	MYBL2	4605	v-myb avian myeloblastosis viral oncogene homolog-like 2	488.64	-1.06319	0.202768	-5.2434	1.57645e-07	3.48928e-05	-2.08955
	MFAP2	4237	microfibrillar-associated protein 2	826.407	0.908535	0.173523	5.23582	1.64252e-07	3.53166e-05	1.87714
	WNT2	7472	wingless-type MMTV integration site family member 2	91.0168	1.46606	0.279976	5.23637	1.63766e-07	3.53166e-05	2.76266
	S100A7A	338324	S100 calcium binding protein A7A	17809.9	-1.08586	0.207981	-5.22094	1.78022e-07	3.77381e-05	-2.12263
	NREP	9315	neuronal regeneration related protein	824.123	0.942704	0.180796	5.21419	1.84623e-07	3.85939e-05	1.92213
	PKMYT1	9088	protein kinase, membrane associated tyrosine/threonine 1	354.836	-1.0491	0.202783	-5.17352	2.29725e-07	4.73644e-05	-2.06924
	HMCN2	256158	hemicentin 2	112.775	1.42553	0.276426	5.15701	2.50926e-07	5.10364e-05	2.68613
	CDC45	8318	cell division cycle 45	359.788	-1.03861	0.201675	-5.14992	2.60596e-07	5.22963e-05	-2.05425
	TICRR	90381	TOPBP1-interacting checkpoint and replication regulator	197.793	-1.26241	0.246491	-5.12155	3.0303e-07	6.00119e-05	-2.39897
	SETBP1	26040	SET binding protein 1	669.28	0.900219	0.176263	5.10724	3.26907e-07	6.30805e-05	1.86635
	TPX2	22974	TPX2, microtubule-associated	799.247	-1.16832	0.228697	-5.1086	3.24562e-07	6.30805e-05	-2.2475
	KIFC1	3833	kinesin family member C1	811.004	-1.18142	0.231677	-5.09942	3.40688e-07	6.49075e-05	-2.268
	CDCA5	113130	cell division cycle associated 5	645.566	-1.08277	0.212587	-5.0933	3.51878e-07	6.62015e-05	-2.1181
	PRICKLE1	144165	prickle homolog 1 (Drosophila)	396.038	1.15667	0.228113	5.07059	3.96578e-07	7.36902e-05	2.22942
	LBH	81606	limb bud and heart development	2183.57	1.20545	0.239348	5.0364	4.74372e-07	8.70705e-05	2.30609
	CCL28	56477	chemokine (C-C motif) ligand 28	399.458	1.31085	0.260547	5.03116	4.87518e-07	8.81288e-05	2.48088
	FAM150B	285016	family with sequence similarity 150, member B	124.016	1.40375	0.279104	5.02947	4.91849e-07	8.81288e-05	2.64588
	SKA3	221150	spindle and kinetochore associated complex subunit 3	190.425	-1.26637	0.252252	-5.02028	5.15975e-07	9.1364e-05	-2.40556
	PRC1	9055	protein regulator of cytokinesis 1	1070.29	-1.08178	0.215671	-5.01588	5.27917e-07	9.23915e-05	-2.11664
	TACC3	10460	transforming, acidic coiled-coil containing protein 3	1073.41	-0.970207	0.193592	-5.0116	5.39783e-07	9.33825e-05	-1.95912
	KIF18B	146909	kinesin family member 18B	473.287	-1.16851	0.234342	-4.98633	6.15374e-07	0.00010525	-2.24779
	CD83	9308	CD83 molecule	495.271	1.04966	0.211009	4.97447	6.54273e-07	0.000109416	2.07004
	TMEM86A	144110	transmembrane protein 86A	1809.32	-0.90767	0.182401	-4.97624	6.48314e-07	0.000109416	-1.87601
	RUNX1	861	runt-related transcription factor 1	4213.89	0.993879	0.200492	4.9572	7.15182e-07	0.000118288	1.99153
	ATP12A	479	ATPase, H+/K+ transporting, nongastric, alpha polypeptide	928.356	-1.17358	0.237482	-4.94178	7.74113e-07	0.000125396	-2.25571
	MAP1B	4131	microtubule-associated protein 1B	1510.43	0.771219	0.156067	4.9416	7.74821e-07	0.000125396	1.70671
	BGN	633	biglycan	7283.52	1.28025	0.259543	4.9327	8.10996e-07	0.000129854	2.42881
	PNMAL1	55228	paraneoplastic Ma antigen family-like 1	274.757	1.17005	0.237405	4.92848	8.28739e-07	0.000131298	2.25019
	TK1	7083	thymidine kinase 1, soluble	946.676	-1.05716	0.215249	-4.91134	9.04553e-07	0.000141817	-2.08083
	BMP6	654	bone morphogenetic protein 6	306.662	1.12823	0.230064	4.90398	9.3915e-07	0.000145723	2.1859
	HPSE	10855	heparanase	992.375	-0.826867	0.169346	-4.88272	1.04632e-06	0.000160696	-1.77383
	SEMA7A	8482	semaphorin 7A, GPI membrane anchor (John Milton Hagen blood group)	1125.88	0.835728	0.171759	4.86571	1.14049e-06	0.000173388	1.78476
	CCL8	6355	chemokine (C-C motif) ligand 8	76.7607	-1.3588	0.279924	-4.85417	1.20892e-06	0.000181955	-2.56471
	TMEM45A	55076	transmembrane protein 45A	17488.3	-0.731025	0.150754	-4.84912	1.24013e-06	0.000184803	-1.65982
	NCAPH	23397	non-SMC condensin I complex, subunit H	347.928	-1.09592	0.226666	-4.83496	1.33171e-06	0.000196505	-2.1375
	ALOX15B	247	arachidonate 15-lipoxygenase, type B	1486.34	-0.97151	0.201286	-4.82651	1.38945e-06	0.000203036	-1.96089
	CCNB2	9133	cyclin B2	470.771	-1.20623	0.250306	-4.81902	1.44264e-06	0.000205813	-2.30734
	HMMR	3161	hyaluronan-mediated motility receptor (RHAMM)	183.352	-1.18749	0.246465	-4.81808	1.44949e-06	0.000205813	-2.27756
	UBE2C	11065	ubiquitin-conjugating enzyme E2C	595.409	-1.21339	0.251732	-4.82017	1.43437e-06	0.000205813	-2.31882
	SERPINB3	6317	serpin peptidase inhibitor, clade B (ovalbumin), member 3	12705.2	-0.68872	0.143273	-4.80706	1.53169e-06	0.000215453	-1.61185
	SERPINE1	5054	serpin peptidase inhibitor, clade E (nexin, plasminogen activator inhibitor type 1), member 1	6941.49	1.22354	0.254742	4.80307	1.56255e-06	0.000217758	2.3352
	TM4SF1	4071	transmembrane 4 L six family member 1	9703.67	0.686989	0.143469	4.78842	1.68097e-06	0.000232112	1.60992
	PBK	55872	PDZ binding kinase	262.235	-1.1932	0.250029	-4.77224	1.82187e-06	0.000249282	-2.28659
	DNASE1L3	1776	deoxyribonuclease I-like 3	358.276	-0.99652	0.208918	-4.76991	1.84309e-06	0.000249913	-1.99518
	ASPM	259266	asp (abnormal spindle) homolog, microcephaly associated (Drosophila)	291.85	-1.22392	0.257357	-4.75575	1.97709e-06	0.000263338	-2.33581
	FOXM1	2305	forkhead box M1	813.383	-1.02423	0.21529	-4.75747	1.96039e-06	0.000263338	-2.03388
	CTSV	1515	cathepsin V	4773.2	0.817021	0.172075	4.74805	2.05389e-06	0.000271168	1.76176
	MYEOV	26579	myeloma overexpressed	735.914	0.899085	0.189735	4.73865	2.15149e-06	0.000281583	1.86488
	TBX3	6926	T-box 3	1902.32	0.85375	0.180394	4.73269	2.21568e-06	0.000287485	1.80719
	GDNF	2668	glial cell derived neurotrophic factor	248.81	1.13243	0.241503	4.68907	2.74444e-06	0.000353048	2.19227
	MCM2	4171	minichromosome maintenance complex component 2	1159.35	-0.760149	0.162232	-4.68555	2.79206e-06	0.000356129	-1.69367
	BUB1B	701	BUB1 mitotic checkpoint serine/threonine kinase B	316.765	-1.07062	0.229179	-4.67154	2.98957e-06	0.000378117	-2.10033
	RBP1	5947	retinol binding protein 1, cellular	1670.3	0.986409	0.211727	4.65888	3.17941e-06	0.000398778	1.98125
	COMP	1311	cartilage oligomeric matrix protein	2840.76	0.946482	0.203537	4.65018	3.31646e-06	0.00041253	1.92717
	ALPK2	115701	alpha-kinase 2	55.9054	1.30116	0.279939	4.64802	3.35137e-06	0.000413454	2.46427
	TAGLN	6876	transgelin	963.671	0.957278	0.20745	4.61449	3.94054e-06	0.000482187	1.94164
	NUF2	83540	NUF2, NDC80 kinetochore complex component	161.392	-1.16316	0.252987	-4.59772	4.27134e-06	0.000518451	-2.23948
	KIF3C	3797	kinesin family member 3C	732.429	0.841674	0.183302	4.59174	4.39561e-06	0.000529267	1.79213
	PTK7	5754	protein tyrosine kinase 7 (inactive)	5398.86	0.705064	0.153745	4.58594	4.51958e-06	0.000539875	1.63022
	CDCA2	157313	cell division cycle associated 2	131.676	-1.17971	0.257472	-4.58192	4.60723e-06	0.000546011	-2.26532
	TNC	3371	tenascin C	15790.6	0.687471	0.150355	4.57232	4.82345e-06	0.00056717	1.61046
	TGM1	7051	transglutaminase 1	5514.36	-0.766649	0.168248	-4.55666	5.19729e-06	0.00060639	-1.70131
	COL12A1	1303	collagen, type XII, alpha 1	2400.04	0.795704	0.175158	4.54277	5.55202e-06	0.000642796	1.73592
	MXRA5	25878	matrix-remodelling associated 5	2213.71	0.951319	0.210372	4.52208	6.12339e-06	0.000703535	1.93364
	F3	2152	coagulation factor III (thromboplastin, tissue factor)	1231.99	0.886422	0.196205	4.51784	6.24736e-06	0.000712341	1.84859
	COL9A2	1298	collagen, type IX, alpha 2	664.676	1.17969	0.261798	4.50609	6.60338e-06	0.000747274	2.26527
	NCAPG	64151	non-SMC condensin I complex, subunit G	293.728	-1.09087	0.242353	-4.50118	6.75784e-06	0.000759046	-2.13003
	CCNB1	891	cyclin B1	1119.42	-1.09651	0.244579	-4.48324	7.3517e-06	0.000819633	-2.13836
	NUSAP1	51203	nucleolar and spindle associated protein 1	804.621	-1.03289	0.230642	-4.47832	7.52323e-06	0.000826512	-2.04612
	TPSB2	64499	tryptase beta 2 (gene/pseudogene)	592.462	1.20121	0.268162	4.47941	7.48509e-06	0.000826512	2.29932
	PRELP	5549	proline/arginine-rich end leucine-rich repeat protein	1683.59	0.781682	0.174635	4.47609	7.60216e-06	0.000829131	1.71913
	BLMH	642	bleomycin hydrolase	7935.72	-0.70443	0.157708	-4.46668	7.94444e-06	0.000860229	-1.6295
	WNT7A	7476	wingless-type MMTV integration site family, member 7A	288.312	1.21564	0.273363	4.447	8.70782e-06	0.000936153	2.32244
	F5	2153	coagulation factor V (proaccelerin, labile factor)	100.787	1.17361	0.264006	4.4454	8.77265e-06	0.000936434	2.25576
	NEDD9	4739	neural precursor cell expressed, developmentally down-regulated 9	601.767	0.930196	0.209518	4.4397	9.00834e-06	0.00095482	1.90553
	FOXC1	2296	forkhead box C1	934.133	0.91591	0.207182	4.4208	9.83369e-06	0.00103501	1.88676
	PIK3CD	5293	phosphatidylinositol-4,5-bisphosphate 3-kinase, catalytic subunit delta	1483.07	0.761865	0.1731	4.40129	1.07608e-05	0.00112472	1.69568
	PLK1	5347	polo-like kinase 1	680.214	-1.00715	0.228979	-4.39844	1.09032e-05	0.00113175	-2.00994
	ACE	1636	angiotensin I converting enzyme	848.846	1.16471	0.266913	4.36361	1.27932e-05	0.00130987	2.24188
	AEBP1	165	AE binding protein 1	7764.34	0.674868	0.154638	4.36419	1.27595e-05	0.00130987	1.59645
	ADTRP	84830	androgen-dependent TFPI-regulating protein	913.632	-0.884238	0.203624	-4.3425	1.4087e-05	0.00142334	-1.84579
	CCDC80	151887	coiled-coil domain containing 80	1030.05	1.07202	0.246869	4.34244	1.40906e-05	0.00142334	2.10237
	TMEM45B	120224	transmembrane protein 45B	3970.6	-0.703052	0.162022	-4.33923	1.42984e-05	0.0014347	-1.62794
	SGCD	6444	sarcoglycan, delta (35kDa dystrophin-associated glycoprotein)	174.667	1.15422	0.26695	4.32373	1.53416e-05	0.00152918	2.22564
	SEMA3C	10512	sema domain, immunoglobulin domain (Ig), short basic domain, secreted, (semaphorin) 3C	1513.4	0.890677	0.206137	4.32079	1.55469e-05	0.00152938	1.85405
	SPTBN5	51332	spectrin, beta, non-erythrocytic 5	1146.16	0.790995	0.183006	4.32223	1.54461e-05	0.00152938	1.73027
	CCNA2	890	cyclin A2	423.213	-1.00045	0.231699	-4.31788	1.57537e-05	0.00153967	-2.00062
	FANCI	55215	Fanconi anemia, complementation group I	995.499	-0.819778	0.189981	-4.31504	1.59571e-05	0.00154949	-1.76513
	FGFBP1	9982	fibroblast growth factor binding protein 1	38126.3	-0.671295	0.155708	-4.31123	1.62347e-05	0.00156634	-1.5925
	SH2D2A	9047	SH2 domain containing 2A	431.682	1.07221	0.248986	4.30633	1.65984e-05	0.00157427	2.10266
	SLC5A1	6523	solute carrier family 5 (sodium/glucose cotransporter), member 1	2283.98	-0.720421	0.16731	-4.3059	1.66307e-05	0.00157427	-1.64766
	TRIM22	10346	tripartite motif containing 22	3564.6	1.10214	0.255861	4.30756	1.65068e-05	0.00157427	2.14673
	KIF23	9493	kinesin family member 23	457.098	-1.05084	0.244417	-4.29938	1.71276e-05	0.00161118	-2.07174
	CDCA3	83461	cell division cycle associated 3	282.532	-1.09666	0.256066	-4.28273	1.84614e-05	0.00172586	-2.13859
	OLFM2	93145	olfactomedin 2	4152.33	0.660788	0.154362	4.28076	1.8626e-05	0.00173049	1.58095
	AQP9	366	aquaporin 9	835.792	-0.761059	0.178238	-4.26991	1.9555e-05	0.00179465	-1.69473
	KIAA0101	9768	KIAA0101	222.197	-0.969146	0.226914	-4.27098	1.94613e-05	0.00179465	-1.95768
	CYP19A1	1588	cytochrome P450, family 19, subfamily A, polypeptide 1	111.505	-1.18793	0.279702	-4.24712	2.16537e-05	0.00197521	-2.27825
	LUM	4060	lumican	1565.61	1.07291	0.253505	4.23228	2.31337e-05	0.0020975	2.10367
	KANK4	163782	KN motif and ankyrin repeat domains 4	28.8473	1.14604	0.271322	4.22391	2.40103e-05	0.00216395	2.21305
	HMGB2	3148	high mobility group box 2	1957.13	-0.741285	0.175652	-4.2202	2.44091e-05	0.00218679	-1.67166
	FMO1	2326	flavin containing monooxygenase 1	238.631	-0.9324	0.222036	-4.19933	2.6771e-05	0.0023842	-1.90845
	COL8A1	1295	collagen, type VIII, alpha 1	293.048	1.15968	0.276265	4.19771	2.69622e-05	0.00238711	2.23408
	SMAD7	4092	SMAD family member 7	1025.47	0.872987	0.208482	4.18735	2.82232e-05	0.00248413	1.83145
	GPC4	2239	glypican 4	531.725	1.1699	0.279567	4.18467	2.85584e-05	0.00249903	2.24996
	MYCT1	80177	myc target 1	699.983	0.850523	0.203552	4.17841	2.9355e-05	0.00255389	1.80315
	TLR6	10333	toll-like receptor 6	239.485	1.15027	0.275687	4.17238	3.01436e-05	0.00260742	2.21956
	UBE2QL1	134111	ubiquitin-conjugating enzyme E2Q family-like 1	266.883	0.916809	0.220193	4.16367	3.13175e-05	0.00269348	1.88793
	KIF15	56992	kinesin family member 15	128.554	-1.06066	0.254917	-4.1608	3.17136e-05	0.00271205	-2.08589
	KIF26B	55083	kinesin family member 26B	230.306	1.06391	0.256018	4.15562	3.24411e-05	0.00275859	2.0906
	APLN	8862	apelin	1343.11	0.937382	0.226694	4.13501	3.54941e-05	0.00298448	1.91505
	TMEM97	27346	transmembrane protein 97	820.514	-0.838164	0.20266	-4.13583	3.53681e-05	0.00298448	-1.78777
	LINC00152	112597	long intergenic non-protein coding RNA 152	167.154	1.001	0.243085	4.1179	3.82333e-05	0.00319694	2.00139
	PDGFB	5155	platelet-derived growth factor beta polypeptide	933.261	1.09773	0.266786	4.11463	3.87803e-05	0.00322477	2.14017
	CNTN1	1272	contactin 1	381.084	-0.985995	0.239946	-4.10924	3.96968e-05	0.00328284	-1.98068
	GABRB3	2562	gamma-aminobutyric acid (GABA) A receptor, beta 3	80.5946	-1.12701	0.275213	-4.09505	4.2208e-05	0.00347144	-2.18406
	SLITRK6	84189	SLIT and NTRK-like family, member 6	236.873	1.04068	0.254538	4.08853	4.34118e-05	0.00355104	2.0572
	CDT1	81620	chromatin licensing and DNA replication factor 1	502.097	-0.776369	0.190796	-4.0691	4.71955e-05	0.00383967	-1.71282
	SCO2	9997	SCO2 cytochrome c oxidase assembly protein	326.88	0.845589	0.207901	4.06727	4.75674e-05	0.00384912	1.797
	MATN2	4147	matrilin 2	1272.99	0.801049	0.197425	4.05749	4.96032e-05	0.00399239	1.74237
	KIF20B	9585	kinesin family member 20B	213.514	-1.01231	0.249573	-4.05619	4.98804e-05	0.00399335	-2.01714
	RAD54L	8438	RAD54-like (S. cerevisiae)	306.466	-1.00772	0.248527	-4.05479	5.01797e-05	0.00399606	-2.01074
	KIF2C	11004	kinesin family member 2C	561.458	-0.977414	0.241883	-4.04086	5.32562e-05	0.00421873	-1.96893
	RASSF10	644943	Ras association (RalGDS/AF-6) domain family (N-terminal) member 10	713.11	0.806232	0.199682	4.03758	5.40059e-05	0.00425572	1.74864
	CLDN11	5010	claudin 11	238.423	-1.00581	0.249249	-4.03537	5.45171e-05	0.00427363	-2.00807
	LMO4	8543	LIM domain only 4	2561.87	0.729897	0.181103	4.03029	5.57088e-05	0.00434442	1.65852
	CTSK	1513	cathepsin K	4765.92	-0.91394	0.22728	-4.02121	5.78992e-05	0.00449196	-1.88418
	GLIS2	84662	GLIS family zinc finger 2	992.958	0.758859	0.189059	4.01388	5.97277e-05	0.00461006	1.69215
	CREB3L1	90993	cAMP responsive element binding protein 3-like 1	131.223	1.03122	0.257208	4.0093	6.08988e-05	0.00467647	2.04376
	KIF20A	10112	kinesin family member 20A	479.736	-1.06949	0.266902	-4.00706	6.14792e-05	0.00469708	-2.09869
	ADAMTSL4	54507	ADAMTS-like 4	2740.12	-0.655098	0.163602	-4.00423	6.22195e-05	0.00472963	-1.57472
	ITGA2	3673	integrin, alpha 2 (CD49B, alpha 2 subunit of VLA-2 receptor)	4602.65	0.765188	0.191228	4.00145	6.29554e-05	0.00476152	1.69959
	CDC25A	993	cell division cycle 25A	193.506	-0.959627	0.240073	-3.99724	6.40863e-05	0.00482281	-1.94481
	PRRX2	51450	paired related homeobox 2	1457.04	0.635639	0.159122	3.99466	6.47879e-05	0.0048413	1.55363
	SMC4	10051	structural maintenance of chromosomes 4	1093.36	-0.782049	0.195807	-3.99397	6.49753e-05	0.0048413	-1.71957
	B4GALT1	2683	UDP-Gal:betaGlcNAc beta 1,4- galactosyltransferase, polypeptide 1	7134.38	0.634536	0.159165	3.98665	6.70139e-05	0.0049118	1.55244
	IRF1	3659	interferon regulatory factor 1	2187.73	0.658108	0.165109	3.98589	6.72268e-05	0.0049118	1.57801
	SGPP2	130367	sphingosine-1-phosphate phosphatase 2	762.61	-0.778911	0.195278	-3.98873	6.64272e-05	0.0049118	-1.71584
	SPSB1	80176	splA/ryanodine receptor domain and SOCS box containing 1	1401.32	0.699637	0.175474	3.98714	6.68751e-05	0.0049118	1.6241
	WDR87	83889	WD repeat domain 87	28.2555	-1.07427	0.270786	-3.96724	7.27084e-05	0.00528664	-2.10566
	CCDC92	80212	coiled-coil domain containing 92	1765.81	0.638371	0.161184	3.9605	7.47915e-05	0.00538606	1.55657
	SPRR2A	6700	small proline-rich protein 2A	3088.72	-0.954695	0.240995	-3.96147	7.44901e-05	0.00538606	-1.93817
	CDK1	983	cyclin-dependent kinase 1	630.645	-0.983522	0.248966	-3.95043	7.80121e-05	0.00555375	-1.97729
	PRR11	55771	proline rich 11	341.486	-0.987787	0.250087	-3.94977	7.8227e-05	0.00555375	-1.98314
	UCN2	90226	urocortin 2	929.563	0.760738	0.192541	3.95104	7.78132e-05	0.00555375	1.69436
	XKRX	402415	XK, Kell blood group complex subunit-related, X-linked	658.194	-0.77149	0.195587	-3.94447	7.99753e-05	0.00565121	-1.70703
	CYP4F22	126410	cytochrome P450, family 4, subfamily F, polypeptide 22	2335.65	-0.748648	0.189944	-3.94141	8.10032e-05	0.0056971	-1.68022
	TLR2	7097	toll-like receptor 2	998.305	0.866209	0.22019	3.93392	8.35729e-05	0.00585049	1.82287
	EVA1A	84141	eva-1 homolog A (C. elegans)	304.194	1.04018	0.264651	3.9304	8.48064e-05	0.00590936	2.05649
	ELN	2006	elastin	641.419	1.09934	0.279997	3.92626	8.62782e-05	0.00598421	2.14257
	FHOD3	80206	formin homology 2 domain containing 3	385.41	0.912933	0.232714	3.92299	8.74581e-05	0.00603822	1.88287
	ENDOU	8909	endonuclease, polyU-specific	304.71	-0.899865	0.230849	-3.89807	9.69613e-05	0.00660346	-1.86589
	MFSD2A	84879	major facilitator superfamily domain containing 2A	1337.21	-0.79715	0.20447	-3.89862	9.67442e-05	0.00660346	-1.73767
	TTYH3	80727	tweety family member 3	4009.3	0.689688	0.176916	3.89839	9.68347e-05	0.00660346	1.61293
	ZWINT	11130	ZW10 interacting kinetochore protein	943.004	-0.787507	0.202168	-3.89531	9.80749e-05	0.00664922	-1.72609
	AURKA	6790	aurora kinase A	325.166	-0.952699	0.245887	-3.87454	0.000106824	0.00720993	-1.93549
	ARHGAP11A	9824	Rho GTPase activating protein 11A	356.439	-0.828047	0.213917	-3.87088	0.000108445	0.00728576	-1.77528
	CDC6	990	cell division cycle 6	509.496	-0.735872	0.190157	-3.86982	0.000108916	0.00728576	-1.6654
	VIPR1	7433	vasoactive intestinal peptide receptor 1	1219.33	0.670268	0.17373	3.85809	0.000114275	0.00761043	1.59137
	RHOB	388	ras homolog family member B	4254.47	0.712588	0.18528	3.84601	0.000120058	0.0079603	1.63874
	ESPL1	9700	extra spindle pole bodies homolog 1 (S. cerevisiae)	793.144	-0.89961	0.2347	-3.83302	0.000126577	0.00831927	-1.86556
	KIF11	3832	kinesin family member 11	347.811	-0.928673	0.24226	-3.83337	0.000126399	0.00831927	-1.90352
	MFAP4	4239	microfibrillar-associated protein 4	657.261	1.05804	0.27616	3.83126	0.000127488	0.00834268	2.0821
	GALNT2	2590	polypeptide N-acetylgalactosaminyltransferase 2	3191.7	0.603086	0.157494	3.82926	0.000128529	0.00837443	1.51896
	SPAG5	10615	sperm associated antigen 5	757.409	-0.831115	0.217107	-3.82813	0.000129118	0.00837653	-1.77906
	IGF1R	3480	insulin-like growth factor 1 receptor	5370.73	0.615631	0.161006	3.82367	0.000131482	0.00845702	1.53223
	RSPO3	84870	R-spondin 3	271.019	-1.04741	0.273864	-3.82457	0.000130999	0.00845702	-2.06682
	HAS3	3038	hyaluronan synthase 3	4202.86	-0.582884	0.153052	-3.8084	0.000139869	0.00895819	-1.49784
	SULF2	55959	sulfatase 2	3587.89	0.967116	0.254959	3.79321	0.00014871	0.00948405	1.95493
	POLQ	10721	polymerase (DNA directed), theta	214.457	-0.916463	0.24179	-3.79033	0.00015045	0.00955451	-1.88748
	GTSE1	51512	G-2 and S-phase expressed 1	288.15	-0.979773	0.258633	-3.78828	0.000151693	0.00959302	-1.97215
	NEK2	4751	NIMA-related kinase 2	127.537	-1.04896	0.278014	-3.77306	0.000161256	0.010155	-2.06904
	ASF1B	55723	anti-silencing function 1B histone chaperone	380.827	-0.792343	0.210153	-3.77032	0.000163039	0.0102246	-1.73188
	TTK	7272	TTK protein kinase	192.114	-0.962818	0.255608	-3.76678	0.000165368	0.0103276	-1.94911
	RECQL4	9401	RecQ protein-like 4	1124.96	-0.751961	0.199864	-3.76236	0.000168317	0.0104253	-1.68408
	RNASE7	84659	ribonuclease, RNase A family, 7	4244.56	-0.792698	0.210674	-3.76268	0.000168101	0.0104253	-1.73231
	ATAD2	29028	ATPase family, AAA domain containing 2	460.956	-0.750752	0.199793	-3.75766	0.000171512	0.0104771	-1.68267
	EDIL3	10085	EGF-like repeats and discoidin I-like domains 3	234.891	1.00972	0.26875	3.75709	0.000171898	0.0104771	2.01352
	GADD45G	10912	growth arrest and DNA-damage-inducible, gamma	273.636	0.899129	0.239253	3.75806	0.000171235	0.0104771	1.86494
	NOV	4856	nephroblastoma overexpressed	671.705	0.737307	0.196247	3.75704	0.000171938	0.0104771	1.66706
	ADC	NA	NA	391.514	1.02598	0.273958	3.74503	0.00018037	0.0109026	2.03634
	HMGCS1	3157	3-hydroxy-3-methylglutaryl-CoA synthase 1 (soluble)	11088.2	-0.675449	0.180321	-3.74581	0.000179816	0.0109026	-1.59709
	IFNK	56832	interferon, kappa	337.379	1.04803	0.279985	3.74315	0.000181729	0.0109408	2.0677
	TINAGL1	64129	tubulointerstitial nephritis antigen-like 1	2108.17	0.687667	0.184006	3.7372	0.000186082	0.0111582	1.61068
	BPGM	669	2,3-bisphosphoglycerate mutase	1039.36	0.777016	0.208111	3.73366	0.000188714	0.0112448	1.71358
	SPTLC3	55304	serine palmitoyltransferase, long chain base subunit 3	1310.37	-0.63751	0.170765	-3.73326	0.000189019	0.0112448	-1.55564
	MRC2	9902	mannose receptor, C type 2	4835.04	0.695634	0.186639	3.72716	0.00019365	0.0114749	1.6196
	CACHD1	57685	cache domain containing 1	1598.92	0.576364	0.154694	3.72583	0.000194676	0.0114905	1.49109
	HEPHL1	341208	hephaestin-like 1	1891.17	-0.632176	0.169759	-3.72397	0.000196115	0.0115302	-1.5499
	DRAXIN	374946	dorsal inhibitory axon guidance protein	48.1923	1.00236	0.269797	3.71525	0.000203	0.0118425	2.00328
	NOTUM	147111	notum pectinacetylesterase homolog (Drosophila)	521.272	0.916137	0.246545	3.71591	0.000202474	0.0118425	1.88706
	TNFSF10	8743	tumor necrosis factor (ligand) superfamily, member 10	10934.3	0.650172	0.17507	3.71379	0.000204179	0.0118653	1.56936
	C5orf46	389336	chromosome 5 open reading frame 46	383.185	0.992055	0.267432	3.70956	0.000207617	0.0120186	1.98902
	EFNA1	1942	ephrin-A1	7908.98	0.536432	0.145137	3.69603	0.000218994	0.0126287	1.45038
	BUB1	699	BUB1 mitotic checkpoint serine/threonine kinase	318.555	-0.934115	0.253337	-3.68724	0.000226701	0.0128818	-1.91072
	RHCG	51458	Rh family, C glycoprotein	2211.24	-0.638783	0.173205	-3.68802	0.00022601	0.0128818	-1.55702
	SLC16A6	9120	solute carrier family 16, member 6	111.451	-0.964744	0.261653	-3.68712	0.000226808	0.0128818	-1.95172
	STARD4-AS1	100505678	STARD4 antisense RNA 1	133.133	0.96895	0.262699	3.68844	0.00022563	0.0128818	1.95742
	TMEM132A	54972	transmembrane protein 132A	4077.42	0.830677	0.225382	3.68565	0.000228122	0.0129078	1.77852
	ARRDC3	57561	arrestin domain containing 3	2892.43	0.593222	0.161123	3.68179	0.000231604	0.0130351	1.50861
	WNT11	7481	wingless-type MMTV integration site family, member 11	139.245	0.947919	0.2575	3.68124	0.000232104	0.0130351	1.92909
	SKA1	220134	spindle and kinetochore associated complex subunit 1	116.749	-0.982369	0.267062	-3.67843	0.000234678	0.0131306	-1.97571
	CDK14	5218	cyclin-dependent kinase 14	533.362	0.912866	0.248459	3.67411	0.000238684	0.0133053	1.88278
	IVL	3713	involucrin	14051	-0.672209	0.18339	-3.66546	0.000246899	0.0137125	-1.59351
	ELOVL4	6785	ELOVL fatty acid elongase 4	2865.59	-0.606341	0.165668	-3.65997	0.000252248	0.013958	-1.52239
	LPCAT2	54947	lysophosphatidylcholine acyltransferase 2	1001.27	0.728935	0.199281	3.65783	0.00025436	0.0140233	1.65742
	RASGRP1	10125	RAS guanyl releasing protein 1 (calcium and DAG-regulated)	304.25	-0.774211	0.211902	-3.65363	0.000258562	0.014203	-1.71025
	KLRG2	346689	killer cell lectin-like receptor subfamily G, member 2	163.015	0.974228	0.267141	3.64687	0.000265451	0.0145284	1.96459
	ARHGEF40	55701	Rho guanine nucleotide exchange factor (GEF) 40	2130.66	0.823847	0.226345	3.63978	0.000272869	0.0148737	1.77012
	MARCKSL1	65108	MARCKS-like 1	2855.61	0.777843	0.213754	3.63896	0.000273737	0.0148737	1.71457
	PLXNA2	5362	plexin A2	2119.5	0.595125	0.163622	3.6372	0.000275619	0.0149221	1.5106
	SPINK5	11005	serine peptidase inhibitor, Kazal type 5	11227.8	-0.568028	0.156303	-3.63416	0.00027889	0.015045	-1.4825
	LOC646862	NA	NA	178.902	-0.886487	0.244378	-3.62753	0.000286147	0.0153448	-1.84867
	NLRP10	338322	NLR family, pyrin domain containing 10	347.342	-0.91847	0.253216	-3.62722	0.000286486	0.0153448	-1.89011
	MCM10	55388	minichromosome maintenance complex component 10	135.409	-0.936731	0.25863	-3.62189	0.000292457	0.0156091	-1.91419
	KIF18A	81930	kinesin family member 18A	57.7065	-1.00746	0.278455	-3.61805	0.000296826	0.0157307	-2.01037
	SPRR2B	6701	small proline-rich protein 2B	6159.34	-0.833273	0.230293	-3.61832	0.000296524	0.0157307	-1.78172
	HMGCR	3156	3-hydroxy-3-methylglutaryl-CoA reductase	7331.11	-0.602369	0.166538	-3.61701	0.000298028	0.015739	-1.51821
	IL12RB2	3595	interleukin 12 receptor, beta 2	528.738	0.957854	0.264953	3.61519	0.000300132	0.0157947	1.94242
	CYP1A1	1543	cytochrome P450, family 1, subfamily A, polypeptide 1	1144.66	0.846622	0.234606	3.6087	0.000307733	0.0161383	1.79829
	LIPG	9388	lipase, endothelial	1664.57	-0.575234	0.159912	-3.59718	0.000321686	0.0168115	-1.48992
	TES	26136	testin LIM domain protein	2398.42	0.540039	0.150224	3.5949	0.000324517	0.0169007	1.45401
	S100A12	6283	S100 calcium binding protein A12	144.574	-0.934429	0.260275	-3.59015	0.000330485	0.0171522	-1.91113
	KIAA1524	57650	KIAA1524	106.864	-0.931247	0.259867	-3.58355	0.00033896	0.0174715	-1.90692
	ME1	4199	malic enzyme 1, NADP(+)-dependent, cytosolic	1639.05	-0.741519	0.206905	-3.58386	0.000338554	0.0174715	-1.67193
	NCAPG2	54892	non-SMC condensin II complex, subunit G2	773.621	-0.639816	0.178865	-3.57708	0.000347452	0.0178481	-1.55813
	FANCD2	2177	Fanconi anemia, complementation group D2	454.675	-0.71721	0.200567	-3.57592	0.000348997	0.0178665	-1.644
	MAMDC2	256691	MAM domain containing 2	149.803	0.955551	0.267743	3.56891	0.000358471	0.0182893	1.93932
	CENPN	55839	centromere protein N	503.586	-0.729278	0.204604	-3.56435	0.000364761	0.0184849	-1.65781
	E2F1	1869	E2F transcription factor 1	526.731	-0.669343	0.187751	-3.56507	0.000363763	0.0184849	-1.59035
	RND1	27289	Rho family GTPase 1	94.8392	0.963137	0.270474	3.56092	0.000369558	0.0186652	1.94954
	PSRC1	84722	proline/serine-rich coiled-coil 1	349.614	-0.785903	0.220859	-3.55839	0.00037313	0.0187826	-1.72417
	SDR9C7	121214	short chain dehydrogenase/reductase family 9C, member 7	2716.47	-0.739402	0.207877	-3.55691	0.000375237	0.0188256	-1.66948
	LRRN1	57633	leucine rich repeat neuronal 1	222.635	0.832597	0.23489	3.54462	0.000393173	0.0196599	1.78089
	CKAP2	26586	cytoskeleton associated protein 2	605.429	-0.635047	0.179252	-3.54276	0.000395958	0.0197336	-1.55299
	ADAMTSL2	9719	ADAMTS-like 2	54.3697	0.98352	0.277762	3.54088	0.000398797	0.0197444	1.97728
	GPX3	2878	glutathione peroxidase 3	6217.41	-0.701533	0.198091	-3.54148	0.000397891	0.0197444	-1.62623
	TMC5	79838	transmembrane channel-like 5	500.079	-0.73862	0.208986	-3.53429	0.000408865	0.0201765	-1.66858
	LMNB1	4001	lamin B1	772.105	-0.703328	0.199712	-3.52171	0.000428779	0.0210901	-1.62826
	IGFL2	147920	IGF-like family member 2	494.396	-0.738358	0.210236	-3.51204	0.000444676	0.0218007	-1.66828
	RASL11B	65997	RAS-like, family 11, member B	106.289	0.937984	0.267405	3.50772	0.000451957	0.0220143	1.91585
	TNFRSF21	27242	tumor necrosis factor receptor superfamily, member 21	1605.44	0.817689	0.23311	3.50774	0.000451926	0.0220143	1.76258
	CECR1	51816	cat eye syndrome chromosome region, candidate 1	232.567	0.934352	0.266457	3.50657	0.000453914	0.0220382	1.91103
	MELK	9833	maternal embryonic leucine zipper kinase	379.342	-0.808366	0.230665	-3.50451	0.000457447	0.0221384	-1.75123
	PTK2	5747	protein tyrosine kinase 2	4883.7	0.655556	0.187165	3.50255	0.000460824	0.0222303	1.57522
	CCDC150	284992	coiled-coil domain containing 150	73.7807	-0.969276	0.27707	-3.49831	0.000468225	0.0225152	-1.95786
	COL7A1	1294	collagen, type VII, alpha 1	29372.6	0.520982	0.149061	3.49508	0.000473916	0.0227163	1.43493
	IL36G	56300	interleukin 36, gamma	559.793	-0.677063	0.193888	-3.49204	0.00047935	0.0229038	-1.59888
	FAM111B	374393	family with sequence similarity 111, member B	244.736	-0.831112	0.238278	-3.48799	0.00048666	0.0231795	-1.77906
	C1QA	712	complement component 1, q subcomponent, A chain	118.002	-0.940268	0.269901	-3.48376	0.000494427	0.023328	-1.91888
	MYO10	4651	myosin X	4455.4	0.518937	0.148946	3.48406	0.000493873	0.023328	1.4329
	SAMD9L	219285	sterile alpha motif domain containing 9-like	693.031	0.859457	0.246621	3.48493	0.000492263	0.023328	1.81436
	APCDD1L	164284	adenomatosis polyposis coli down-regulated 1-like	128.214	0.912498	0.262	3.48281	0.000496176	0.0233373	1.8823
	THBS1	7057	thrombospondin 1	6229.62	0.931156	0.267606	3.47957	0.000502211	0.0235476	1.9068
	ACER1	125981	alkaline ceramidase 1	1087.32	-0.758921	0.218435	-3.47436	0.000512073	0.0238613	-1.69222
	CIITA	4261	class II, major histocompatibility complex, transactivator	501.539	0.840945	0.241988	3.47516	0.000510557	0.0238613	1.79122
	PLAUR	5329	plasminogen activator, urokinase receptor	1767.51	0.542323	0.156282	3.47016	0.000520139	0.0241624	1.45632
	MAD2L1	4085	MAD2 mitotic arrest deficient-like 1 (yeast)	201.437	-0.851617	0.246073	-3.46083	0.000538507	0.0249387	-1.80452
	ANLN	54443	anillin, actin binding protein	741.981	-0.885883	0.256047	-3.45985	0.00054048	0.0249532	-1.8479
	ADAM33	80332	ADAM metallopeptidase domain 33	691.891	-0.650535	0.188143	-3.45766	0.000544897	0.0250194	-1.56975
	CXCR1	3577	chemokine (C-X-C motif) receptor 1	80.2634	0.967462	0.279816	3.45749	0.000545237	0.0250194	1.9554
	BMPR2	659	bone morphogenetic protein receptor, type II (serine/threonine kinase)	1812	0.600541	0.173764	3.45607	0.000548119	0.0250752	1.51628
	TMCC2	9911	transmembrane and coiled-coil domain family 2	279.398	0.783343	0.226735	3.45489	0.000550521	0.0251087	1.72111
	CCNF	899	cyclin F	725.725	-0.736886	0.213657	-3.44891	0.000562846	0.0255933	-1.66657
	TRPS1	7227	trichorhinophalangeal syndrome I	848.487	0.8456	0.245336	3.4467	0.000567474	0.025726	1.79701
	CKAP2L	150468	cytoskeleton associated protein 2-like	111.866	-0.897389	0.260908	-3.43949	0.000582821	0.0263424	-1.86269
	CHEK1	1111	checkpoint kinase 1	372.206	-0.686791	0.200055	-3.43301	0.000596909	0.0268984	-1.6097
	FLRT2	23768	fibronectin leucine rich transmembrane protein 2	1578.63	0.552581	0.16105	3.43111	0.000601121	0.0270074	1.46671
	ZBED6	100381270	zinc finger, BED-type containing 6	94.3613	0.959932	0.28003	3.42797	0.000608123	0.0272407	1.94522
	C19orf48	84798	chromosome 19 open reading frame 48	2439.92	-0.520939	0.152153	-3.42378	0.000617559	0.0275813	-1.43489
	CRABP1	1381	cellular retinoic acid binding protein 1	363.153	0.943071	0.27574	3.42014	0.000625885	0.0278704	1.92262
	AMTN	401138	amelotin	47.2294	0.786616	0.230626	3.41078	0.000647771	0.0287599	1.72502
	FGF1	2246	fibroblast growth factor 1 (acidic)	156.616	0.895159	0.262578	3.40911	0.000651743	0.0287665	1.85981
	PDLIM4	8572	PDZ and LIM domain 4	2345.03	0.621173	0.182173	3.40981	0.000650085	0.0287665	1.53813
	ANGPTL2	23452	angiopoietin-like 2	5690.81	0.719048	0.211252	3.40374	0.000664693	0.0292523	1.6461
	FSTL3	10272	follistatin-like 3 (secreted glycoprotein)	2068.21	0.791483	0.233235	3.3935	0.000690048	0.0302796	1.73085
	SOSTDC1	25928	sclerostin domain containing 1	394.161	0.939256	0.276852	3.39264	0.000692238	0.0302874	1.91754
	ATP1B1	481	ATPase, Na+/K+ transporting, beta 1 polypeptide	2117.97	0.907446	0.267688	3.38994	0.000699076	0.0304979	1.87572
	ITGAV	3685	integrin, alpha V	4122.38	0.650627	0.192212	3.38493	0.000711952	0.0309699	1.56985
	LMX1B	4010	LIM homeobox transcription factor 1, beta	347.9	0.808003	0.239213	3.37776	0.00073079	0.0316978	1.75079
	BRCA1	672	breast cancer 1, early onset	367.606	-0.68116	0.201852	-3.37455	0.00073937	0.0319777	-1.60343
	GSDMA	284110	gasdermin A	2678.2	-0.728449	0.216014	-3.37224	0.000745604	0.032155	-1.65686
	PLK4	10733	polo-like kinase 4	201.971	-0.81234	0.240975	-3.37106	0.00074879	0.0322001	-1.75606
	DDX12P	440081	DEAD/H (Asp-Glu-Ala-Asp/His) box polypeptide 12, pseudogene	231.28	-0.783852	0.232755	-3.36771	0.000757955	0.0325014	-1.72172
	CRHR1	1394	corticotropin releasing hormone receptor 1	76.3609	0.941511	0.279751	3.36553	0.000763972	0.0326663	1.92054
	CASC15	401237	cancer susceptibility candidate 15 (non-protein coding)	38.7017	0.907728	0.269915	3.36301	0.000770975	0.0328724	1.87609
	RNF112	7732	ring finger protein 112	132.833	0.909164	0.270554	3.36038	0.000778359	0.0330934	1.87796
	VEGFC	7424	vascular endothelial growth factor C	339.314	0.727311	0.216587	3.35806	0.00078493	0.0332788	1.65555
	BMF	90427	Bcl2 modifying factor	878.745	0.778221	0.232004	3.35435	0.00079553	0.0336335	1.71502
	CIT	11113	citron rho-interacting serine/threonine kinase	497.254	-0.78603	0.234549	-3.35123	0.000804527	0.0338238	-1.72432
	MIR4435-1HG	NA	NA	183.719	0.871616	0.260087	3.35125	0.000804476	0.0338238	1.82971
	LAMB3	3914	laminin, beta 3	16456.6	0.698686	0.208625	3.34901	0.000811022	0.0340019	1.62303
	SPNS2	124976	spinster homolog 2 (Drosophila)	1822.52	-0.626551	0.187308	-3.34504	0.000822715	0.0343963	-1.54387
	EFNB2	1948	ephrin-B2	1892.48	0.543739	0.162836	3.33918	0.000840274	0.0350331	1.45775
	CCL22	6367	chemokine (C-C motif) ligand 22	527.186	0.888801	0.266479	3.33535	0.000851907	0.03542	1.85164
	CYB5R2	51700	cytochrome b5 reductase 2	2047.72	-0.524399	0.15744	-3.33079	0.000865985	0.0358075	-1.43833
	PTTG1	9232	pituitary tumor-transforming 1	1031.81	-0.723521	0.217208	-3.331	0.000865343	0.0358075	-1.65121
	SPC25	57405	SPC25, NDC80 kinetochore complex component	120.529	-0.90673	0.272538	-3.32699	0.000877907	0.036201	-1.87479
	PTAFR	5724	platelet-activating factor receptor	542.4	-0.790415	0.237677	-3.32558	0.000882333	0.0362841	-1.72957
	SESN3	143686	sestrin 3	2018.41	0.742707	0.223581	3.32187	0.000894152	0.03667	1.67331
	FAP	2191	fibroblast activation protein, alpha	588.013	0.802927	0.241867	3.31971	0.000901114	0.0368551	1.74464
	AOC1	26	amine oxidase, copper containing 1	356.845	0.824592	0.248526	3.31793	0.000906874	0.0369901	1.77103
	DIO2	1734	deiodinase, iodothyronine, type II	1128.06	0.762429	0.230233	3.31156	0.000927777	0.0377404	1.69634
	STC2	8614	stanniocalcin 2	846.717	0.739515	0.223365	3.3108	0.000930313	0.0377416	1.66961
	CCDC3	83643	coiled-coil domain containing 3	4196.31	0.744254	0.22525	3.30412	0.000952735	0.038444	1.67511
	WISP3	8838	WNT1 inducible signaling pathway protein 3	136.135	-0.835588	0.252837	-3.30484	0.000950296	0.038444	-1.78458
	ANKH	56172	ANKH inorganic pyrophosphate transport regulator	3502.02	0.510375	0.154596	3.30136	0.000962189	0.0384756	1.42442
	CCDC8	83987	coiled-coil domain containing 8	368.238	0.858775	0.260164	3.3009	0.000963742	0.0384756	1.8135
	FEN1	2237	flap structure-specific endonuclease 1	1142.61	-0.540388	0.163669	-3.3017	0.000960997	0.0384756	-1.45436
	TNFRSF11B	4982	tumor necrosis factor receptor superfamily, member 11b	344.088	0.917986	0.278045	3.30157	0.000961459	0.0384756	1.88948
	ATP13A5	344905	ATPase type 13A5	420.469	0.921079	0.279401	3.29662	0.000978566	0.0388612	1.89353
	PDLIM7	9260	PDZ and LIM domain 7 (enigma)	3337.9	0.533362	0.16178	3.29682	0.000977848	0.0388612	1.4473
	ISLR	3671	immunoglobulin superfamily containing leucine-rich repeat	786.661	0.777097	0.235852	3.29485	0.000984727	0.039003	1.71368
	IFIT5	24138	interferon-induced protein with tetratricopeptide repeats 5	886.435	0.600542	0.182655	3.28784	0.00100958	0.0398823	1.51629
	RNF19B	127544	ring finger protein 19B	3278.9	0.597765	0.182026	3.28395	0.00102362	0.0403311	1.51337
	SEPT6	23157	septin 6	1050.16	0.580332	0.176855	3.28139	0.00103297	0.0405932	1.49519
	EPHX2	2053	epoxide hydrolase 2, cytoplasmic	1504.38	-0.551314	0.168336	-3.27508	0.00105633	0.0412988	-1.46542
	FGFR3	2261	fibroblast growth factor receptor 3	18429.2	-0.592557	0.180971	-3.27432	0.00105915	0.0412988	-1.50792
	STEAP4	79689	STEAP family member 4	3336.59	-0.771835	0.235722	-3.27435	0.00105906	0.0412988	-1.70744
	CKS2	1164	CDC28 protein kinase regulatory subunit 2	707.173	-0.619312	0.189331	-3.27105	0.00107151	0.0416725	-1.53614
	CDKN3	1033	cyclin-dependent kinase inhibitor 3	213.915	-0.851979	0.260969	-3.26467	0.0010959	0.0425113	-1.80498
	SMPD3	55512	sphingomyelin phosphodiesterase 3, neutral membrane (neutral sphingomyelinase II)	2692.96	-0.67554	0.207146	-3.26118	0.00110948	0.0429274	-1.59719
	FNDC3B	64778	fibronectin type III domain containing 3B	1238.39	0.649291	0.199244	3.25878	0.00111892	0.0431817	1.5684
	LRRC4	64101	leucine rich repeat containing 4	35.2019	0.87116	0.267623	3.25518	0.00113322	0.0436219	1.82913
	MCM6	4175	minichromosome maintenance complex component 6	1385.77	-0.592031	0.182008	-3.25278	0.00114281	0.0438787	-1.50737
	RAD51	5888	RAD51 recombinase	206.983	-0.760846	0.234159	-3.24928	0.001157	0.0441978	-1.69448
	SKIL	6498	SKI-like proto-oncogene	857.717	0.620593	0.190967	3.24974	0.00115509	0.0441978	1.53751
	TAGLN3	29114	transgelin 3	62.3337	-0.895792	0.275944	-3.24628	0.00116923	0.0445522	-1.86063
	RUNX3	864	runt-related transcription factor 3	1560.25	0.616925	0.190398	3.24019	0.00119449	0.0453997	1.5336
	TLR3	7098	toll-like receptor 3	162.243	0.784743	0.242247	3.23943	0.00119769	0.0454067	1.72279
	DES	1674	desmin	113.458	0.881358	0.272265	3.23714	0.00120735	0.0456579	1.84211
	PLOD2	5352	procollagen-lysine, 2-oxoglutarate 5-dioxygenase 2	1075.92	0.804	0.248536	3.23494	0.00121667	0.045895	1.74594
	FUT3	2525	fucosyltransferase 3 (galactoside 3(4)-L-fucosyltransferase, Lewis blood group)	566.315	-0.781306	0.241614	-3.23369	0.00122202	0.0459814	-1.71869
	SPECC1	92521	sperm antigen with calponin homology and coiled-coil domains 1	671.341	0.659779	0.204152	3.23181	0.00123009	0.0461697	1.57984
	INPP5D	3635	inositol polyphosphate-5-phosphatase, 145kDa	752.022	0.582562	0.18041	3.22909	0.00124183	0.0464947	1.49751
	KIF14	9928	kinesin family member 14	114.286	-0.891671	0.276252	-3.22775	0.00124769	0.0465981	-1.85532
	CMTM3	123920	CKLF-like MARVEL transmembrane domain containing 3	1114.52	0.678307	0.210779	3.2181	0.00129045	0.0480756	1.60026
	EEPD1	80820	endonuclease/exonuclease/phosphatase family domain containing 1	294.349	-0.708113	0.220189	-3.21593	0.00130022	0.0482009	-1.63367
	PIF1	80119	PIF1 5'-to-3' DNA helicase	231.778	-0.882421	0.274382	-3.21603	0.00129977	0.0482009	-1.84347
	SH2D5	400745	SH2 domain containing 5	1542.96	-0.683043	0.212604	-3.21275	0.00131472	0.0486188	-1.60552
	CRNN	49860	cornulin	97.9948	-0.860769	0.268258	-3.20873	0.00133321	0.0488227	-1.81601
	FHOD1	29109	formin homology 2 domain containing 1	2481.27	0.539154	0.168022	3.20882	0.00133282	0.0488227	1.45312
	GBP5	115362	guanylate binding protein 5	179.851	0.859572	0.267832	3.20937	0.00133026	0.0488227	1.8145
	PCDHGC3	5098	protocadherin gamma subfamily C, 3	2025.12	0.497351	0.154924	3.21028	0.00132604	0.0488227	1.41162
	FAM83E	54854	family with sequence similarity 83, member E	322.608	0.660052	0.206042	3.20349	0.00135774	0.0496003	1.58014
	HJURP	55355	Holliday junction recognition protein	423.723	-0.820175	0.25744	-3.18588	0.00144313	0.052592	-1.76562
	WDR62	284403	WD repeat domain 62	433.544	-0.720376	0.226274	-3.18365	0.00145432	0.0528719	-1.64761
	GXYLT2	727936	glucoside xylosyltransferase 2	66.1687	0.868903	0.273096	3.18167	0.00146427	0.0530958	1.82627
	RAB15	376267	RAB15, member RAS oncogene family	1613.61	0.578564	0.18188	3.18103	0.00146753	0.0530958	1.49336
	DDR1	780	discoidin domain receptor tyrosine kinase 1	15209.5	0.49765	0.156493	3.18001	0.00147269	0.0531545	1.41191
	PLAU	5328	plasminogen activator, urokinase	8235.52	0.705142	0.221792	3.17929	0.00147634	0.0531589	1.63031
	FAM64A	54478	family with sequence similarity 64, member A	87.8304	-0.868969	0.273701	-3.17488	0.00149898	0.0538453	-1.82636
	RDH12	145226	retinol dehydrogenase 12 (all-trans/9-cis/11-cis)	3839.74	-0.691922	0.218185	-3.17126	0.0015178	0.0543913	-1.61543
	PFKFB4	5210	6-phosphofructo-2-kinase/fructose-2,6-biphosphatase 4	2177.89	0.539429	0.170169	3.16995	0.00152464	0.0545066	1.4534
	UBE2T	29089	ubiquitin-conjugating enzyme E2T	402.82	-0.631608	0.19938	-3.16786	0.00153565	0.0547701	-1.54929
	CLSPN	63967	claspin	185.648	-0.779684	0.246347	-3.16498	0.00155094	0.0551847	-1.71676
	ZDHHC2	51201	zinc finger, DHHC-type containing 2	409.994	0.740948	0.234437	3.16054	0.00157478	0.0559011	1.67127
	CAMK2N1	55450	calcium/calmodulin-dependent protein kinase II inhibitor 1	954.608	0.684285	0.216908	3.15473	0.00160645	0.0568911	1.60691
	ANO6	196527	anoctamin 6	2969	0.557863	0.176947	3.15271	0.00161762	0.0571173	1.47209
	EXOC3L2	90332	exocyst complex component 3-like 2	97.031	0.846141	0.268429	3.1522	0.00162043	0.0571173	1.79769
	SP100	6672	SP100 nuclear antigen	3602.48	0.489479	0.155805	3.14161	0.00168022	0.0590863	1.40394
	TNNI2	7136	troponin I type 2 (skeletal, fast)	341.382	-0.870003	0.277501	-3.13514	0.00171772	0.0602645	-1.82767
	DEPDC1	55635	DEP domain containing 1	105.168	-0.875167	0.279441	-3.13184	0.00173712	0.0608033	-1.83422
	CYP51A1	1595	cytochrome P450, family 51, subfamily A, polypeptide 1	3346.05	-0.511779	0.163589	-3.12845	0.0017573	0.0613669	-1.42581
	PLSCR1	5359	phospholipid scramblase 1	2579.29	0.698269	0.223351	3.12633	0.00177005	0.0616691	1.62256
	GGCT	79017	gamma-glutamylcyclotransferase	6604.86	-0.596351	0.191025	-3.12184	0.00179723	0.0624201	-1.51189
	RGS3	5998	regulator of G-protein signaling 3	2430.34	0.561038	0.179739	3.12141	0.0017999	0.0624201	1.47533
	SHROOM4	57477	shroom family member 4	553.771	0.802742	0.257442	3.11815	0.00181988	0.0629678	1.74441
	TLR1	7096	toll-like receptor 1	228.347	0.863029	0.276948	3.11621	0.0018319	0.0632382	1.81885
	PRR5L	79899	proline rich 5 like	211.116	0.808543	0.259945	3.11044	0.0018681	0.0643405	1.75144
	AADAC	13	arylacetamide deacetylase	183.236	-0.799649	0.257539	-3.10496	0.00190306	0.0653947	-1.74068
	BHLHE41	79365	basic helix-loop-helix family, member e41	855.404	0.817113	0.263683	3.09884	0.00194277	0.0663943	1.76188
	CEACAM7	1087	carcinoembryonic antigen-related cell adhesion molecule 7	230.275	0.861568	0.278033	3.0988	0.00194306	0.0663943	1.81701
	MISP	126353	mitotic spindle positioning	98.6232	0.815056	0.263053	3.09845	0.00194538	0.0663943	1.75937
	OBP2A	29991	odorant binding protein 2A	70.4774	0.865216	0.279598	3.0945	0.00197148	0.0671328	1.82161
	BDKRB2	624	bradykinin receptor B2	2353.75	-0.537257	0.173744	-3.09223	0.00198659	0.0672743	-1.45121
	DDX11L2	84771	DEAD/H (Asp-Glu-Ala-Asp/His) box helicase 11 like 2	37.7278	-0.786491	0.254269	-3.09315	0.00198045	0.0672743	-1.72487
	GLB1L3	112937	galactosidase, beta 1-like 3	422.55	-0.659631	0.213344	-3.09186	0.00198904	0.0672743	-1.57968
	CD151	977	CD151 molecule (Raph blood group)	10516.2	0.45341	0.146817	3.08827	0.00201325	0.0679406	1.36927
	CENPA	1058	centromere protein A	173.902	-0.823202	0.26702	-3.08292	0.00204981	0.0690195	-1.76933
	CCL5	6352	chemokine (C-C motif) ligand 5	1185.63	0.860923	0.279484	3.0804	0.00206722	0.0692956	1.8162
	PRR15L	79170	proline rich 15-like	262.29	0.860721	0.279373	3.08091	0.00206371	0.0692956	1.81595
	AMIGO2	347902	adhesion molecule with Ig-like domain 2	754.083	0.8167	0.26537	3.07759	0.00208685	0.0697085	1.76137
	POC1A	25886	POC1 centriolar protein A	346.125	-0.692008	0.224874	-3.07731	0.0020888	0.0697085	-1.61553
	FCHSD1	89848	FCH and double SH3 domains 1	4472.05	-0.471293	0.153234	-3.07565	0.00210048	0.0699431	-1.38635
	P4HA2	8974	prolyl 4-hydroxylase, alpha polypeptide II	1950.49	0.570807	0.185831	3.07164	0.00212884	0.0707311	1.48535
	IFI44	10561	interferon-induced protein 44	1820.18	0.836202	0.272428	3.06944	0.00214462	0.0709421	1.78534
	IGFL1	374918	IGF-like family member 1	95.6442	0.859354	0.279951	3.06966	0.00214306	0.0709421	1.81423
	RNF213	57674	ring finger protein 213	12342.5	0.61609	0.200792	3.06831	0.00215276	0.0710552	1.53272
	CHAF1A	10036	chromatin assembly factor 1, subunit A (p150)	791.873	-0.595625	0.194287	-3.06569	0.0021717	0.0713193	-1.51113
	ROBO4	54538	roundabout, axon guidance receptor, homolog 4 (Drosophila)	1338.33	0.780546	0.254645	3.06524	0.00217498	0.0713193	1.71778
	XPR1	9213	xenotropic and polytropic retrovirus receptor 1	1682.7	0.504672	0.164592	3.06619	0.00216805	0.0713193	1.4188
	HLA-F	3134	major histocompatibility complex, class I, F	4162.95	0.495755	0.1619	3.06212	0.00219778	0.0719104	1.41006
	FAM227A	646851	family with sequence similarity 227, member A	135.296	0.831515	0.271777	3.05955	0.00221671	0.07206	1.77955
	GLTP	51228	glycolipid transfer protein	23642.6	-0.524458	0.17139	-3.06003	0.00221317	0.07206	-1.43839
	IFI6	2537	interferon, alpha-inducible protein 6	21707.1	0.84094	0.274781	3.0604	0.00221042	0.07206	1.79122
	GPX2	2877	glutathione peroxidase 2	3594.15	0.778232	0.254482	3.05811	0.0022274	0.0722512	1.71503
	CHST3	9469	carbohydrate (chondroitin 6) sulfotransferase 3	2919.28	0.455502	0.148984	3.05738	0.00223278	0.07227	1.37126
	C2	717	complement component 2	237.581	-0.752758	0.246312	-3.05611	0.00224225	0.0723051	-1.68501
	EPHB2	2048	EPH receptor B2	147.351	0.788392	0.258123	3.05432	0.0022557	0.0723051	1.72715
	IFITM10	402778	interferon induced transmembrane protein 10	354.51	0.760407	0.248943	3.05454	0.00225408	0.0723051	1.69397
	ODF3B	440836	outer dense fiber of sperm tails 3B	2177.69	0.609597	0.199492	3.05575	0.00224499	0.0723051	1.52583
	PTPRK	5796	protein tyrosine phosphatase, receptor type, K	1742.82	0.698188	0.228612	3.05403	0.00225788	0.0723051	1.62247
	DEPDC1B	55789	DEP domain containing 1B	133.217	-0.817078	0.267918	-3.04973	0.00229048	0.073038	-1.76183
	GPC6	10082	glypican 6	111.73	0.833795	0.273393	3.0498	0.00228991	0.073038	1.78237
	ELOVL6	79071	ELOVL fatty acid elongase 6	817.194	-0.556445	0.182571	-3.04783	0.00230497	0.0733448	-1.47064
	SYNE1	23345	spectrin repeat containing, nuclear envelope 1	1319.28	0.583872	0.191683	3.04603	0.00231884	0.0736305	1.49887
	ABCA12	26154	ATP-binding cassette, sub-family A (ABC1), member 12	6731.94	-0.588969	0.193655	-3.04133	0.00235537	0.0746331	-1.50417
	CYP2E1	1571	cytochrome P450, family 2, subfamily E, polypeptide 1	427.93	-0.619828	0.203933	-3.03938	0.00237067	0.074803	-1.53669
	IMPDH2	3615	IMP (inosine 5'-monophosphate) dehydrogenase 2	13753.7	-0.417886	0.137479	-3.03964	0.00236858	0.074803	-1.33597
	NID2	22795	nidogen 2 (osteonidogen)	395.161	0.846633	0.278778	3.03694	0.0023899	0.0752518	1.7983
	GLDN	342035	gliomedin	231.442	-0.695276	0.229219	-3.03324	0.00241941	0.076022	-1.61919
	SLC4A3	6508	solute carrier family 4 (anion exchanger), member 3	443.645	0.733085	0.24176	3.03228	0.00242712	0.0761053	1.66219
	CENPO	79172	centromere protein O	604.58	-0.602659	0.199104	-3.02686	0.00247109	0.0773229	-1.51851
	KIAA0754	643314	KIAA0754	131.288	0.794405	0.262621	3.02491	0.00248707	0.0776617	1.73436
	GINS2	51659	GINS complex subunit 2 (Psf2 homolog)	257.467	-0.66198	0.218982	-3.02298	0.00250297	0.0779963	-1.58225
	HLA-C	3107	major histocompatibility complex, class I, C	22684	0.500811	0.165938	3.01807	0.00254394	0.079109	1.41501
	CDCA7	83879	cell division cycle associated 7	865.374	-0.611699	0.202862	-3.01534	0.00256689	0.0796583	-1.52806
	SCPEP1	59342	serine carboxypeptidase 1	2797.43	0.529915	0.175818	3.014	0.00257829	0.0798475	1.44384
	ABCC3	8714	ATP-binding cassette, sub-family C (CFTR/MRP), member 3	2124.7	-0.522164	0.173357	-3.01207	0.00259476	0.0798928	-1.43611
	DTL	51514	denticleless E3 ubiquitin protein ligase homolog (Drosophila)	217.493	-0.707462	0.234884	-3.01196	0.00259568	0.0798928	-1.63293
	ZNF827	152485	zinc finger protein 827	155.319	0.725643	0.240856	3.01276	0.00258883	0.0798928	1.65364
	JUN	3725	jun proto-oncogene	4607.01	0.455532	0.151422	3.00836	0.00262661	0.0806797	1.37129
	ITPR2	3709	inositol 1,4,5-trisphosphate receptor, type 2	2756.11	0.440986	0.146655	3.00695	0.00263882	0.0808899	1.35753
	LRP8	7804	low density lipoprotein receptor-related protein 8, apolipoprotein e receptor	1470.16	-0.527341	0.17544	-3.00581	0.00264872	0.0810281	-1.44127
	SRPX	8406	sushi-repeat containing protein, X-linked	795.809	0.715067	0.238047	3.00389	0.00266555	0.0813778	1.64156
	C17orf53	78995	chromosome 17 open reading frame 53	149.128	-0.738727	0.246371	-2.99843	0.00271374	0.0826811	-1.6687
	CENPW	387103	centromere protein W	247.575	-0.754778	0.251958	-2.99566	0.00273856	0.0831008	-1.68737
	POLE2	5427	polymerase (DNA directed), epsilon 2, accessory subunit	213.292	-0.693542	0.231473	-2.99622	0.00273352	0.0831008	-1.61725
	GTF2I	2969	general transcription factor IIi	779.863	0.556859	0.186189	2.99083	0.00278221	0.0842557	1.47106
	FANCA	2175	Fanconi anemia, complementation group A	545.281	-0.677807	0.227044	-2.98536	0.00283245	0.0856048	-1.59971
	TMEM139	135932	transmembrane protein 139	245.851	0.821931	0.275749	2.98072	0.0028757	0.0867378	1.76777
	RPL22L1	200916	ribosomal protein L22-like 1	2701.78	-0.567115	0.190302	-2.98009	0.00288165	0.0867436	-1.48156
	VAV2	7410	vav 2 guanine nucleotide exchange factor	1738.39	0.459439	0.154225	2.97901	0.00289178	0.0868747	1.37501
	ACAT2	39	acetyl-CoA acetyltransferase 2	2836.16	-0.562126	0.188959	-2.97485	0.00293129	0.0875531	-1.47644
	KIAA1644	85352	KIAA1644	346.316	0.705355	0.23711	2.9748	0.00293181	0.0875531	1.63055
	LIPM	340654	lipase, family member M	521.656	-0.57642	0.19374	-2.97523	0.00292772	0.0875531	-1.49114
	NCOR2	9612	nuclear receptor corepressor 2	5828.06	0.466597	0.156939	2.97311	0.00294795	0.0878605	1.38185
	SNHG9	735301	small nucleolar RNA host gene 9	172.039	-0.717219	0.241876	-2.96524	0.00302449	0.0899154	-1.64401
	SPRED1	161742	sprouty-related, EVH1 domain containing 1	800.304	0.505859	0.170622	2.9648	0.00302884	0.0899154	1.41997
	LINC00942	100292680	long intergenic non-protein coding RNA 942	32.0413	0.807341	0.272496	2.96276	0.0030489	0.0903326	1.74998
	EME1	146956	essential meiotic structure-specific endonuclease 1	89.8327	-0.81367	0.27595	-2.94862	0.00319201	0.0940184	-1.75768
	GMNN	51053	geminin, DNA replication inhibitor	642.881	-0.532116	0.180463	-2.94861	0.00319204	0.0940184	-1.44605
	KDM6B	23135	lysine (K)-specific demethylase 6B	3840.7	0.527196	0.178728	2.94971	0.00318069	0.0940184	1.44113
	CDC25C	995	cell division cycle 25C	92.5697	-0.815021	0.276745	-2.94503	0.00322927	0.0949293	-1.75932
	PARP10	84875	poly (ADP-ribose) polymerase family, member 10	3967.5	0.617524	0.209815	2.94318	0.00324862	0.0953118	1.53424
	CENPE	1062	centromere protein E, 312kDa	154.005	-0.794453	0.270052	-2.94185	0.00326255	0.0955344	-1.73442
	FOXS1	2307	forkhead box S1	46.7261	0.71593	0.243501	2.94015	0.00328055	0.0957729	1.64254
	WFDC5	149708	WAP four-disulfide core domain 5	4933.23	-0.427459	0.1454	-2.93988	0.00328342	0.0957729	-1.34486
	PCNA	5111	proliferating cell nuclear antigen	2139.31	-0.450903	0.153509	-2.93731	0.00331074	0.0963828	-1.3669
	LMO7	4008	LIM domain 7	2307.76	-0.528162	0.179908	-2.93573	0.00332761	0.0966871	-1.44209
	SHCBP1	79801	SHC SH2-domain binding protein 1	237.369	-0.719478	0.245138	-2.935	0.00333551	0.0967297	-1.64659
	NHS	4810	Nance-Horan syndrome (congenital cataracts and dental anomalies)	221.398	0.706284	0.240709	2.93418	0.00334427	0.0967972	1.6316
	GDPD3	79153	glycerophosphodiester phosphodiesterase domain containing 3	990.347	-0.584102	0.199285	-2.93099	0.0033788	0.0974299	-1.49911
	KRT7	3855	keratin 7, type II	887.854	0.697118	0.237846	2.93097	0.00337907	0.0974299	1.62126
	MIS18A	54069	MIS18 kinetochore protein A	417.736	-0.567763	0.193777	-2.92999	0.00338975	0.097551	-1.48222
	NEU2	4759	sialidase 2 (cytosolic sialidase)	33.8039	-0.81366	0.278122	-2.92555	0.00343852	0.0984605	-1.75766
	ORC6	23594	origin recognition complex, subunit 6	170.806	-0.716947	0.245083	-2.92532	0.00344098	0.0984605	-1.6437
	TRAIP	10293	TRAF interacting protein	192.435	-0.679721	0.232309	-2.92593	0.00343427	0.0984605	-1.60183
	ARSG	22901	arylsulfatase G	701.401	-0.575184	0.197016	-2.91948	0.00350619	0.0997137	-1.48987
	CMPK2	129607	cytidine monophosphate (UMP-CMP) kinase 2, mitochondrial	812.928	0.814543	0.278988	2.91963	0.00350447	0.0997137	1.75874
	NAALADL2	254827	N-acetylated alpha-linked acidic dipeptidase-like 2	86.2081	0.812513	0.278323	2.91932	0.00350799	0.0997137	1.75627
	REL	5966	v-rel avian reticuloendotheliosis viral oncogene homolog	594.138	0.570378	0.1954	2.91903	0.00351128	0.0997137	1.48491
	C10orf99	387695	chromosome 10 open reading frame 99	2094.39	-0.737732	0.252909	-2.91699	0.00353428	0.100178	-1.66755
	SLCO4A1	28231	solute carrier organic anion transporter family, member 4A1	2320.12	-0.620433	0.212769	-2.91599	0.00354562	0.10031	-1.53734
	H2AFX	3014	H2A histone family, member X	1445.72	-0.548177	0.188069	-2.91476	0.00355957	0.100328	-1.46224
	LOC100996635	100996635	uncharacterized LOC100996635	28.1681	0.769775	0.264068	2.91506	0.0035562	0.100328	1.705
	MRGPRX3	117195	MAS-related GPR, member X3	36.9988	-0.745687	0.256088	-2.91183	0.00359314	0.101085	-1.67677
	HERC6	55008	HECT and RLD domain containing E3 ubiquitin protein ligase family member 6	2722.23	0.797372	0.274116	2.90889	0.00362719	0.101474	1.73793
	KITLG	4254	KIT ligand	460.959	0.65232	0.224163	2.91003	0.003614	0.101474	1.57169
	MREG	55686	melanoregulin	2082.72	-0.533771	0.183468	-2.90934	0.00362188	0.101474	-1.44771
	ANKRD20A19P	400110	ankyrin repeat domain 20 family, member A19, pseudogene	64.4608	0.813362	0.279967	2.90521	0.00367012	0.102315	1.7573
	SERPINF1	5176	serpin peptidase inhibitor, clade F (alpha-2 antiplasmin, pigment epithelium derived factor), member 1	2281.81	-0.485996	0.167288	-2.90514	0.00367087	0.102315	-1.40055
	PCDHB3	56132	protocadherin beta 3	44.5386	0.807102	0.278291	2.90021	0.00372917	0.103748	1.74969
	JAG1	182	jagged 1	11707	0.512665	0.17682	2.89936	0.00373928	0.103837	1.42668
	C1QB	713	complement component 1, q subcomponent, B chain	90.6532	-0.743702	0.25666	-2.89761	0.00376015	0.104033	-1.67447
	PDLIM2	64236	PDZ and LIM domain 2 (mystique)	1790.89	-0.455819	0.15728	-2.89814	0.0037538	0.104033	-1.37156
	C11orf82	NA	NA	173.551	-0.700507	0.24225	-2.89167	0.00383203	0.105827	-1.62508
	SEMA5A	9037	sema domain, seven thrombospondin repeats (type 1 and type 1-like), transmembrane domain (TM) and short cytoplasmic domain, (semaphorin) 5A	780.436	0.703964	0.243502	2.891	0.0038402	0.105859	1.62897
	PKNOX2	63876	PBX/knotted 1 homeobox 2	141.775	0.739398	0.255945	2.8889	0.00386595	0.106374	1.66948
	DDX60	55601	DEAD (Asp-Glu-Ala-Asp) box polypeptide 60	1535.86	0.774128	0.26823	2.88606	0.00390097	0.107124	1.71016
	ELOVL7	79993	ELOVL fatty acid elongase 7	1424.39	-0.55568	0.192574	-2.88554	0.00390745	0.107124	-1.46986
	FBXO27	126433	F-box protein 27	1140.11	-0.786081	0.272542	-2.88425	0.00392342	0.107366	-1.72438
	CLDN8	9073	claudin 8	250.374	0.798177	0.277493	2.87639	0.00402256	0.109879	1.7389
	LCN2	3934	lipocalin 2	6641.39	0.503645	0.175178	2.87505	0.0040397	0.110148	1.41779
	SLC9B2	133308	solute carrier family 9, subfamily B (NHA2, cation proton antiporter 2), member 2	446.237	0.588586	0.2048	2.87395	0.00405368	0.110329	1.50377
	CX3CL1	6376	chemokine (C-X3-C motif) ligand 1	770.861	0.800656	0.278754	2.87226	0.00407542	0.110721	1.74189
	FAT1	2195	FAT atypical cadherin 1	4722.42	0.484385	0.168774	2.87003	0.00410436	0.110906	1.39899
	GALE	2582	UDP-galactose-4-epimerase	1893.09	-0.463399	0.161411	-2.87092	0.00409273	0.110906	-1.37879
	GINS1	9837	GINS complex subunit 1 (Psf1 homolog)	319.803	-0.609926	0.212511	-2.8701	0.00410348	0.110906	-1.52618
	GYLTL1B	120071	glycosyltransferase-like 1B	2535.72	0.430949	0.150247	2.86828	0.00412711	0.111137	1.34812
	SERPINB4	6318	serpin peptidase inhibitor, clade B (ovalbumin), member 4	14637.4	-0.61703	0.215125	-2.86824	0.00412768	0.111137	-1.53371
	PLEKHA4	57664	pleckstrin homology domain containing, family A (phosphoinositide binding specific) member 4	1949.71	0.455405	0.158957	2.86496	0.00417056	0.112091	1.37117
	ZNF532	55205	zinc finger protein 532	1593.65	0.538044	0.188085	2.86064	0.00422786	0.113429	1.452
	XAF1	54739	XIAP associated factor 1	4194.58	0.760014	0.26626	2.8544	0.00431183	0.115476	1.69351
	DACT1	51339	dishevelled-binding antagonist of beta-catenin 1	87.7405	0.78555	0.275756	2.84872	0.00438958	0.117349	1.72375
	PRLR	5618	prolactin receptor	119.267	0.722085	0.253865	2.84436	0.00445006	0.118755	1.64956
	DKK3	27122	dickkopf WNT signaling pathway inhibitor 3	1965.82	0.652205	0.229638	2.84014	0.00450933	0.120124	1.57157
	SPRR2F	6705	small proline-rich protein 2F	60.828	-0.786718	0.277294	-2.83713	0.00455214	0.12105	-1.72515
	CSPG4	1464	chondroitin sulfate proteoglycan 4	1402.78	0.760382	0.26822	2.83492	0.00458373	0.121675	1.69394
	KLK6	5653	kallikrein-related peptidase 6	3456.49	-0.680081	0.240785	-2.82443	0.00473653	0.12551	-1.60223
	CLDN14	23562	claudin 14	79.8756	0.783121	0.277721	2.81981	0.00480514	0.127104	1.72085
	EXO1	9156	exonuclease 1	104.725	-0.740872	0.262913	-2.81794	0.00483329	0.12728	-1.67119
	HEPH	9843	hephaestin	504.814	0.755472	0.268118	2.81768	0.00483715	0.12728	1.68818
	ST3GAL4	6484	ST3 beta-galactoside alpha-2,3-sialyltransferase 4	1206.42	0.644444	0.22867	2.81822	0.00482904	0.12728	1.56314
	ISG20	3669	interferon stimulated exonuclease gene 20kDa	836.37	0.50444	0.17932	2.81307	0.00490716	0.128896	1.41857
	ZNF641	121274	zinc finger protein 641	976.664	0.554266	0.19708	2.81239	0.00491751	0.128943	1.46842
	CENPU	79682	centromere protein U	604.136	-0.542473	0.193211	-2.80766	0.00499022	0.130395	-1.45647
	KCTD4	386618	potassium channel tetramerization domain containing 4	372.329	-0.628513	0.223843	-2.80783	0.00498772	0.130395	-1.54597
	PARM1	25849	prostate androgen-regulated mucin-like protein 1	599.64	0.685161	0.244398	2.80346	0.00505571	0.131878	1.60788
	CD209	30835	CD209 molecule	32.0745	-0.776347	0.277154	-2.80114	0.00509225	0.132601	-1.71279
	B3GNT9	84752	UDP-GlcNAc:betaGal beta-1,3-N-acetylglucosaminyltransferase 9	346.581	0.581091	0.207892	2.79515	0.00518751	0.13458	1.49598
	CXCL6	6372	chemokine (C-X-C motif) ligand 6	204.906	-0.770059	0.275581	-2.79431	0.00520109	0.13458	-1.70534
	HLA-G	3135	major histocompatibility complex, class I, G	793.589	0.539452	0.193095	2.79372	0.0052106	0.13458	1.45342
	PRRT4	401399	proline-rich transmembrane protein 4	460.279	-0.655159	0.234524	-2.79357	0.00521294	0.13458	-1.57479
	RACGAP1	29127	Rac GTPase activating protein 1	1029.94	-0.576918	0.206431	-2.79473	0.00519435	0.13458	-1.49166
	ENG	2022	endoglin	4514.47	0.708958	0.254378	2.78703	0.00531933	0.137091	1.63462
	PDPN	10630	podoplanin	5021.1	0.682127	0.244993	2.78427	0.00536476	0.138026	1.6045
	SGCB	6443	sarcoglycan, beta (43kDa dystrophin-associated glycoprotein)	831.964	0.516904	0.185798	2.78208	0.00540116	0.138725	1.43088
	KPNA2	3838	karyopherin alpha 2 (RAG cohort 1, importin alpha 1)	1980.25	-0.59607	0.214454	-2.77948	0.00544458	0.139602	-1.51159
	GALNT18	374378	polypeptide N-acetylgalactosaminyltransferase 18	1556.95	0.436204	0.157088	2.77681	0.00548952	0.140515	1.35304
	CHST11	50515	carbohydrate (chondroitin 4) sulfotransferase 11	538.51	0.604352	0.217965	2.7727	0.00555927	0.142059	1.5203
	CHTF18	63922	CTF18, chromosome transmission fidelity factor 18 homolog (S. cerevisiae)	873.52	-0.577197	0.208357	-2.77023	0.00560168	0.142688	-1.49195
	EYA2	2139	EYA transcriptional coactivator and phosphatase 2	185.138	0.689913	0.249051	2.77016	0.00560286	0.142688	1.61319
	FZD5	7855	frizzled class receptor 5	237.421	-0.64314	0.232325	-2.76828	0.00563527	0.143271	-1.56172
	HLA-H	3136	major histocompatibility complex, class I, H (pseudogene)	4519.11	0.58563	0.211683	2.76654	0.00566549	0.143796	1.50069
	PARP14	54625	poly (ADP-ribose) polymerase family, member 14	4193.38	0.671418	0.242851	2.76473	0.00569695	0.144352	1.59264
	SPOCK1	6695	sparc/osteonectin, cwcv and kazal-like domains proteoglycan (testican) 1	458.733	0.771562	0.279223	2.76325	0.00572288	0.144765	1.70712
	LINC00885	401109	long intergenic non-protein coding RNA 885	62.4776	0.76246	0.276104	2.7615	0.00575373	0.145301	1.69638
	DGAT2	84649	diacylglycerol O-acyltransferase 2	2954.89	-0.544415	0.197474	-2.75689	0.00583531	0.146768	-1.45843
	DUSP10	11221	dual specificity phosphatase 10	407.584	0.664894	0.241247	2.75607	0.00585003	0.146768	1.58545
	FBXO2	26232	F-box protein 2	3672.28	0.577285	0.209476	2.75585	0.0058539	0.146768	1.49204
	NR1D2	9975	nuclear receptor subfamily 1, group D, member 2	937.878	0.5977	0.216793	2.757	0.00583335	0.146768	1.5133
	RFC3	5983	replication factor C (activator 1) 3, 38kDa	242.051	-0.614108	0.222868	-2.75548	0.00586058	0.146768	-1.53061
	KLHDC7B	113730	kelch domain containing 7B	472.624	0.662374	0.240868	2.74995	0.00596052	0.148776	1.58268
	LIMCH1	22998	LIM and calponin homology domains 1	794.389	0.544402	0.197946	2.75025	0.00595501	0.148776	1.45842
	TM7SF2	7108	transmembrane 7 superfamily member 2	2593.1	-0.574258	0.209139	-2.74582	0.00603602	0.150411	-1.48891
	LIG1	3978	ligase I, DNA, ATP-dependent	1613.16	-0.438814	0.160078	-2.74125	0.00612056	0.15193	-1.35549
	PAPPA	5069	pregnancy-associated plasma protein A, pappalysin 1	256.584	0.760362	0.277469	2.74035	0.00613736	0.15193	1.69392
	PLA2R1	22925	phospholipase A2 receptor 1, 180kDa	996.133	0.696188	0.253948	2.74146	0.00611675	0.15193	1.62022
	TIMM10	26519	translocase of inner mitochondrial membrane 10 homolog (yeast)	1129.91	-0.528882	0.192979	-2.74062	0.00613231	0.15193	-1.44281
	CSMD2	114784	CUB and Sushi multiple domains 2	73.5093	0.766709	0.279918	2.73905	0.00616164	0.152281	1.70138
	FBN1	2200	fibrillin 1	950.328	0.620529	0.226707	2.73714	0.00619763	0.152669	1.53744
	SOX4	6659	SRY (sex determining region Y)-box 4	3002.26	0.735418	0.268632	2.73764	0.00618817	0.152669	1.66488
	SGCA	6442	sarcoglycan, alpha (50kDa dystrophin-associated glycoprotein)	117.574	0.732149	0.267579	2.7362	0.00621533	0.152854	1.66111
	PLA2G4E	123745	phospholipase A2, group IVE	20495.9	-0.546441	0.199821	-2.73465	0.00624461	0.153324	-1.46048
	DTX4	23220	deltex 4, E3 ubiquitin ligase	592.992	0.502556	0.184128	2.72938	0.00634528	0.155266	1.41672
	LIPK	643414	lipase, family member K	534.873	-0.633204	0.232002	-2.7293	0.0063468	0.155266	-1.55101
	TSHZ3	57616	teashirt zinc finger homeobox 3	516.183	0.632381	0.231735	2.7289	0.00635467	0.155266	1.55012
	CNN1	1264	calponin 1, basic, smooth muscle	92.3266	0.67564	0.247784	2.72673	0.00639646	0.155782	1.59731
	TNFRSF12A	51330	tumor necrosis factor receptor superfamily, member 12A	4511.63	0.510981	0.187383	2.72693	0.00639258	0.155782	1.42502
	AACSP1	729522	acetoacetyl-CoA synthetase pseudogene 1	41.8866	0.739768	0.271375	2.726	0.00641066	0.155875	1.66991
	DNM3OS	100628315	DNM3 opposite strand/antisense RNA	246.207	0.673675	0.247558	2.72129	0.00650286	0.157862	1.59513
	SERPINB13	5275	serpin peptidase inhibitor, clade B (ovalbumin), member 13	4242.77	-0.668927	0.24638	-2.71503	0.00662701	0.160617	-1.58989
	SYNPO	11346	synaptopodin	7326.28	0.619915	0.228392	2.71425	0.00664252	0.160734	1.53678
	ARG1	383	arginase 1	360.815	-0.75612	0.278641	-2.7136	0.00665573	0.160795	-1.68894
	WDR90	197335	WD repeat domain 90	1430.19	-0.474285	0.174875	-2.71213	0.00668515	0.161247	-1.38923
	EPN3	55040	epsin 3	2146.12	-0.485674	0.179148	-2.71102	0.00670763	0.16133	-1.40024
	SPRY4	81848	sprouty homolog 4 (Drosophila)	1178.98	0.651651	0.240382	2.7109	0.00671003	0.16133	1.57097
	EVA1C	59271	eva-1 homolog C (C. elegans)	1203.12	-0.49718	0.183517	-2.70918	0.00674499	0.161912	-1.41145
	ZSWIM6	57688	zinc finger, SWIM-type containing 6	525.562	0.520585	0.192199	2.70857	0.00675735	0.161951	1.43454
	BRSK1	84446	BR serine/threonine kinase 1	88.1517	0.74584	0.275795	2.70433	0.00684417	0.163757	1.67695
	DHFR	1719	dihydrofolate reductase	179.627	-0.662469	0.245011	-2.70383	0.00685449	0.163757	-1.58279
	CDH11	1009	cadherin 11, type 2, OB-cadherin (osteoblast)	784.602	0.715867	0.264937	2.70203	0.0068918	0.164387	1.64247
	CYP4F11	57834	cytochrome P450, family 4, subfamily F, polypeptide 11	380.769	-0.62825	0.232559	-2.70146	0.00690351	0.164406	-1.54569
	CHST10	9486	carbohydrate sulfotransferase 10	178.419	0.661701	0.245307	2.69744	0.00698747	0.165881	1.58195
	TONSL	4796	tonsoku-like, DNA repair protein	865.712	-0.504315	0.186925	-2.69796	0.00697654	0.165881	-1.41845
	HEG1	57493	heart development protein with EGF-like domains 1	1416.19	0.698078	0.259423	2.69089	0.00712615	0.168907	1.62234
	ARHGEF28	64283	Rho guanine nucleotide exchange factor (GEF) 28	1479.99	0.45966	0.170864	2.6902	0.00714085	0.168989	1.37522
	D2HGDH	728294	D-2-hydroxyglutarate dehydrogenase	3190.81	-0.468774	0.17435	-2.68869	0.00717336	0.169488	-1.38393
	FIBIN	387758	fin bud initiation factor homolog (zebrafish)	118.037	0.751773	0.27966	2.68817	0.00718447	0.169488	1.68386
	ATG16L2	89849	autophagy related 16-like 2 (S. cerevisiae)	5232.37	-0.460882	0.171551	-2.68657	0.00721908	0.170038	-1.37638
	CTSB	1508	cathepsin B	38086.2	0.461068	0.171822	2.6834	0.0072877	0.170852	1.37656
	KRT80	144501	keratin 80, type II	13099.4	-0.558927	0.208212	-2.68441	0.00726589	0.170852	-1.47317
	TGFBR1	7046	transforming growth factor, beta receptor 1	1501.92	0.448112	0.166985	2.68355	0.00728459	0.170852	1.36425
	P4HA1	5033	prolyl 4-hydroxylase, alpha polypeptide I	2170.47	0.406766	0.151667	2.68198	0.00731881	0.171077	1.32571
	SHANK2	22941	SH3 and multiple ankyrin repeat domains 2	166.526	0.749351	0.279408	2.68192	0.00732002	0.171077	1.68104
	COL6A1	1291	collagen, type VI, alpha 1	14314.4	0.459354	0.171333	2.68106	0.00733896	0.171254	1.37493
	RAET1E	135250	retinoic acid early transcript 1E	999.02	-0.629334	0.235036	-2.67761	0.00741495	0.172759	-1.54685
	ACSS2	55902	acyl-CoA synthetase short-chain family member 2	5141.43	-0.552546	0.206414	-2.67689	0.00743101	0.172863	-1.46667
	BMP1	649	bone morphogenetic protein 1	2733.41	0.39915	0.149183	2.67558	0.00745995	0.172863	1.31873
	IVNS1ABP	10625	influenza virus NS1A binding protein	13203.9	0.482634	0.180401	2.67534	0.00746536	0.172863	1.39729
	POP1	10940	processing of precursor 1, ribonuclease P/MRP subunit (S. cerevisiae)	845.85	-0.463686	0.173299	-2.67564	0.00745877	0.172863	-1.37906
	LAMC3	10319	laminin, gamma 3	1998.15	0.66805	0.249888	2.6734	0.00750877	0.173432	1.58892
	TCF7L2	6934	transcription factor 7-like 2 (T-cell specific, HMG-box)	622.458	0.618951	0.231539	2.67321	0.00751298	0.173432	1.53576
	FZD7	8324	frizzled class receptor 7	2098.74	0.73458	0.274857	2.67259	0.00752673	0.173484	1.66391
	CPNE5	57699	copine V	182.357	0.694207	0.260183	2.66815	0.00762702	0.175258	1.618
	MLXIP	22877	MLX interacting protein	5870.85	0.453305	0.169887	2.66828	0.00762401	0.175258	1.36917
	HCFC1R1	54985	host cell factor C1 regulator 1 (XPO1 dependent)	1403.82	0.472012	0.177028	2.66631	0.00766882	0.17595	1.38704
	CFTR	1080	cystic fibrosis transmembrane conductance regulator (ATP-binding cassette sub-family C, member 7)	293.336	0.731819	0.27463	2.66475	0.00770456	0.176249	1.66073
	PROC	5624	protein C (inactivator of coagulation factors Va and VIIIa)	36.8821	0.731828	0.274636	2.66472	0.00770524	0.176249	1.66074
	IGFN1	91156	immunoglobulin-like and fibronectin type III domain containing 1	112.662	0.693433	0.260798	2.65889	0.00783993	0.179057	1.61713
	ABCA9	10350	ATP-binding cassette, sub-family A (ABC1), member 9	481.782	-0.696182	0.262013	-2.65705	0.00788277	0.179292	-1.62021
	CIDEA	1149	cell death-inducing DFFA-like effector a	239.232	-0.651194	0.245116	-2.65668	0.00789137	0.179292	-1.57047
	FZD6	8323	frizzled class receptor 6	1717.7	0.475354	0.178964	2.65615	0.00790385	0.179292	1.39026
	GBP4	115361	guanylate binding protein 4	246.346	0.659052	0.248147	2.6559	0.00790975	0.179292	1.57904
	UGCG	7357	UDP-glucose ceramide glucosyltransferase	751.074	-0.610635	0.229846	-2.65671	0.00789071	0.179292	-1.52693
	ZNF469	84627	zinc finger protein 469	277.375	0.693842	0.261395	2.65438	0.00794536	0.179828	1.61759
	NOP56	10528	NOP56 ribonucleoprotein	5317.84	-0.376868	0.142123	-2.65171	0.00800842	0.180983	-1.29852
	ARHGAP33	115703	Rho GTPase activating protein 33	556.818	-0.491105	0.18556	-2.64661	0.00813032	0.183462	-1.40552
	CTGF	1490	connective tissue growth factor	733.711	0.715333	0.270491	2.64457	0.00817939	0.184013	1.64186
	HOTAIR	100124700	HOX transcript antisense RNA	661.338	0.527529	0.19962	2.64267	0.00822545	0.184013	1.44146
	MLLT11	10962	myeloid/lymphoid or mixed-lineage leukemia (trithorax homolog, Drosophila); translocated to, 11	242.389	0.621107	0.234971	2.64333	0.00820942	0.184013	1.53806
	PRKAR2B	5577	protein kinase, cAMP-dependent, regulatory, type II, beta	473.569	0.740347	0.280029	2.64383	0.00819746	0.184013	1.67058
	SLC6A15	55117	solute carrier family 6 (neutral amino acid transporter), member 15	168.863	0.642139	0.242999	2.64256	0.00822808	0.184013	1.56064
	SNHG3	8420	small nucleolar RNA host gene 3	3010.8	-0.436996	0.165267	-2.64418	0.00818899	0.184013	-1.35378
	CENPI	2491	centromere protein I	55.1562	-0.734383	0.278101	-2.64071	0.00827334	0.184341	-1.66369
	CRISPLD1	83690	cysteine-rich secretory protein LCCL domain containing 1	106.368	0.719617	0.272535	2.64046	0.00827947	0.184341	1.64675
	MVD	4597	mevalonate (diphospho) decarboxylase	7429.9	-0.589358	0.223178	-2.64075	0.00827226	0.184341	-1.50458
	LAMB4	22798	laminin, beta 4	550.064	-0.700183	0.265453	-2.63769	0.00834734	0.185577	-1.62471
	TMEM2	23670	transmembrane protein 2	2407.45	0.548272	0.207961	2.63642	0.00837847	0.185995	1.46233
	SERPINB2	5055	serpin peptidase inhibitor, clade B (ovalbumin), member 2	6981.16	-0.61919	0.235174	-2.6329	0.00846601	0.187661	-1.53601
	PNMA1	9240	paraneoplastic Ma antigen 1	1269.6	0.50604	0.19227	2.63192	0.00849034	0.187924	1.42015
	PLXNA4	91584	plexin A4	269.467	0.686229	0.260826	2.63099	0.00851372	0.188165	1.60907
	CENPK	64105	centromere protein K	137.082	-0.649695	0.247034	-2.62998	0.00853895	0.188445	-1.56884
	ARHGAP18	93663	Rho GTPase activating protein 18	574.024	0.679737	0.258891	2.62557	0.00865032	0.190624	1.60185
	HBEGF	1839	heparin-binding EGF-like growth factor	1996.65	-0.475956	0.181434	-2.62331	0.00870806	0.191337	-1.39084
	KRT19	3880	keratin 19, type I	1402.36	0.717464	0.273496	2.62331	0.00870811	0.191337	1.64429
	MAP3K9	4293	mitogen-activated protein kinase kinase kinase 9	1421.7	-0.543062	0.207165	-2.6214	0.0087569	0.192128	-1.45706
	FAM168A	23201	family with sequence similarity 168, member A	2122.32	0.422915	0.161417	2.62002	0.00879235	0.192625	1.34063
	B3GALT5	10317	UDP-Gal:betaGlcNAc beta 1,3-galactosyltransferase, polypeptide 5	94.6606	0.732532	0.279813	2.61793	0.00884653	0.193334	1.66155
	XRRA1	143570	X-ray radiation resistance associated 1	136.18	0.680386	0.259909	2.61778	0.00885037	0.193334	1.60257
	PXMP4	11264	peroxisomal membrane protein 4, 24kDa	1265.96	-0.496274	0.189666	-2.61657	0.00888172	0.193737	-1.41057
	RNASE1	6035	ribonuclease, RNase A family, 1 (pancreatic)	938.727	-0.665816	0.254549	-2.61567	0.00890529	0.19397	-1.58647
	CCR7	1236	chemokine (C-C motif) receptor 7	445.736	0.708121	0.270828	2.61466	0.00893174	0.19397	1.63367
	CDC14A	8556	cell division cycle 14A	194.821	0.661766	0.2531	2.61465	0.00893197	0.19397	1.58202
	DEGS2	123099	delta(4)-desaturase, sphingolipid 2	486.712	-0.509375	0.19485	-2.61419	0.00894395	0.19397	-1.42343
	OAS2	4939	2'-5'-oligoadenylate synthetase 2, 69/71kDa	3356.72	0.711709	0.272681	2.61005	0.00905299	0.196053	1.63774
	TEAD2	8463	TEA domain family member 2	1794.95	0.598306	0.229394	2.6082	0.00910188	0.196828	1.51394
	ACTG2	72	actin, gamma 2, smooth muscle, enteric	81.3597	0.714155	0.274143	2.60504	0.00918624	0.198135	1.64052
	IFIT3	3437	interferon-induced protein with tetratricopeptide repeats 3	3055.81	0.697648	0.267816	2.60495	0.00918865	0.198135	1.62186
	PHF19	26147	PHD finger protein 19	1045.49	-0.498853	0.191548	-2.60432	0.00920569	0.198219	-1.41309
	SPARC	6678	secreted protein, acidic, cysteine-rich (osteonectin)	12241.3	0.646219	0.248226	2.60336	0.00923161	0.198493	1.56506
	BCAS4	55653	breast carcinoma amplified sequence 4	61.3993	0.72525	0.27881	2.60123	0.00928898	0.198589	1.65319
	CH25H	9023	cholesterol 25-hydroxylase	284.375	-0.573449	0.220436	-2.60143	0.0092835	0.198589	-1.48808
	MFAP5	8076	microfibrillar associated protein 5	90.6482	0.707747	0.272009	2.60192	0.00927036	0.198589	1.63325
	PLA2G4D	283748	phospholipase A2, group IVD (cytosolic)	1097.12	-0.593453	0.228027	-2.60255	0.00925332	0.198589	-1.50885
	PLEK2	26499	pleckstrin 2	2885.55	0.517883	0.199129	2.60075	0.00930207	0.198589	1.43185
	KIAA1147	57189	KIAA1147	2681.1	0.606123	0.233171	2.59948	0.00933642	0.19904	1.52216
	FBXO45	200933	F-box protein 45	1961.38	-0.404035	0.155499	-2.59831	0.00936832	0.199249	-1.3232
	PPP1R3B	79660	protein phosphatase 1, regulatory subunit 3B	2263.68	0.488723	0.188104	2.59815	0.00937268	0.199249	1.4032
	P2RY6	5031	pyrimidinergic receptor P2Y, G-protein coupled, 6	168.264	0.721523	0.27777	2.59755	0.0093891	0.199316	1.64892
	PCMTD1	115294	protein-L-isoaspartate (D-aspartate) O-methyltransferase domain containing 1	1828.5	0.505137	0.194557	2.59634	0.00942218	0.199737	1.41926
	INHBA	3624	inhibin, beta A	196.018	0.662053	0.255163	2.59463	0.0094694	0.200456	1.58233
	ELOVL1	64834	ELOVL fatty acid elongase 1	8639.17	-0.422476	0.162884	-2.59373	0.00949406	0.200695	-1.34023
	ACHE	43	acetylcholinesterase (Yt blood group)	80.2049	0.707847	0.273153	2.59139	0.00955878	0.20178	1.63337
	GLB1L2	89944	galactosidase, beta 1-like 2	575.305	-0.513863	0.198335	-2.59089	0.00957287	0.201795	-1.42787
	B2M	567	beta-2-microglobulin	101839	0.445864	0.172142	2.59009	0.00959501	0.201933	1.36213
	SAMD10	140700	sterile alpha motif domain containing 10	602.495	-0.529783	0.204574	-2.58969	0.00960628	0.201933	-1.44371
	ZNF165	7718	zinc finger protein 165	259.874	-0.630842	0.243857	-2.58693	0.00968339	0.20327	-1.54847
	BBOX1	8424	butyrobetaine (gamma), 2-oxoglutarate dioxygenase (gamma-butyrobetaine hydroxylase) 1	2210.65	0.5798	0.224182	2.58629	0.00970142	0.203365	1.49464
	FAM114A1	92689	family with sequence similarity 114, member A1	2207.27	0.512069	0.198116	2.5847	0.00974641	0.203785	1.42609
	HLA-A	3105	major histocompatibility complex, class I, A	34307.7	0.521929	0.201941	2.58456	0.00975038	0.203785	1.43587
	STK39	27347	serine threonine kinase 39	560.88	-0.483482	0.187095	-2.58414	0.00976208	0.203785	-1.39811
	MSC	9242	musculin	789.335	0.592628	0.229402	2.58336	0.00978442	0.203969	1.50799
	CYP4F12	66002	cytochrome P450, family 4, subfamily F, polypeptide 12	1820.43	-0.442995	0.171578	-2.58188	0.00982629	0.204558	-1.35942
	ALOX12B	242	arachidonate 12-lipoxygenase, 12R type	3565.96	-0.569223	0.220599	-2.58035	0.00987004	0.205185	-1.48372
	TTC39B	158219	tetratricopeptide repeat domain 39B	1152.55	-0.540867	0.209759	-2.57851	0.00992267	0.205995	-1.45485
	ABI3	51225	ABI family, member 3	367.716	0.524533	0.203914	2.57233	0.0101018	0.208667	1.43847
	AGPAT9	84803	1-acylglycerol-3-phosphate O-acyltransferase 9	525.391	-0.505331	0.196419	-2.57272	0.0100902	0.208667	-1.41945
	ARHGEF39	84904	Rho guanine nucleotide exchange factor (GEF) 39	189.083	-0.61134	0.237587	-2.57312	0.0100785	0.208667	-1.52768
	SPON2	10417	spondin 2, extracellular matrix protein	781.923	0.454461	0.176685	2.57215	0.0101068	0.208667	1.37027
	NFATC2	4773	nuclear factor of activated T-cells, cytoplasmic, calcineurin-dependent 2	575.176	0.491648	0.191192	2.57148	0.0101264	0.208784	1.40605
	SERTAD4	56256	SERTA domain containing 4	251.462	0.560196	0.217903	2.57085	0.0101448	0.208877	1.47447
	SCUBE2	57758	signal peptide, CUB domain, EGF-like 2	354.892	0.653864	0.254409	2.57013	0.0101659	0.209026	1.57338
	CEACAM6	4680	carcinoembryonic antigen-related cell adhesion molecule 6 (non-specific cross reacting antigen)	1205.61	0.621085	0.241736	2.56927	0.0101913	0.209261	1.53803
	TSPAN2	10100	tetraspanin 2	65.9505	0.6911	0.269129	2.56791	0.0102313	0.209797	1.61451
	DPYSL4	10570	dihydropyrimidinase-like 4	209.987	0.614474	0.23972	2.5633	0.0103683	0.212028	1.531
	GPX8	493869	glutathione peroxidase 8 (putative)	409.658	0.511991	0.199729	2.56343	0.0103643	0.212028	1.42602
	BAIAP2-AS1	440465	BAIAP2 antisense RNA 1 (head to head)	457.264	0.531663	0.207535	2.56179	0.0104133	0.212085	1.44559
	POF1B	79983	premature ovarian failure, 1B	5483.97	-0.49193	0.191999	-2.56215	0.0104026	0.212085	-1.40632
	SHISA2	387914	shisa family member 2	121.346	0.704146	0.274824	2.56217	0.010402	0.212085	1.62918
	CCBL2	56267	cysteine conjugate-beta lyase 2	1552.4	-0.511458	0.199896	-2.55862	0.0105088	0.213683	-1.42549
	YPEL2	388403	yippee-like 2 (Drosophila)	1528.73	0.419879	0.164128	2.55825	0.0105202	0.213683	1.33781
	MSMO1	6307	methylsterol monooxygenase 1	7526.48	-0.460582	0.180113	-2.55718	0.0105525	0.21405	-1.3761
	HELZ2	85441	helicase with zinc finger 2, transcriptional coactivator	4951.21	0.637258	0.249293	2.55626	0.0105804	0.214328	1.55537
	HELLS	3070	helicase, lymphoid-specific	171.207	-0.628604	0.246119	-2.55406	0.0106474	0.215381	-1.54607
	PTGES	9536	prostaglandin E synthase	9381.01	-0.359002	0.140586	-2.55362	0.010661	0.215381	-1.28254
	NR5A2	2494	nuclear receptor subfamily 5, group A, member 2	159.384	0.663631	0.260233	2.55015	0.0107678	0.217247	1.58406
	SPHK1	8877	sphingosine kinase 1	3263.26	0.631877	0.24792	2.54871	0.0108122	0.21785	1.54958
	SGOL1	151648	shugoshin-like 1 (S. pombe)	43.2692	-0.707674	0.277803	-2.54739	0.0108531	0.218291	-1.63317
	TUBBP5	643224	tubulin, beta pseudogene 5	74.3086	-0.713223	0.280017	-2.54707	0.010863	0.218291	-1.63946
	IL20RA	53832	interleukin 20 receptor, alpha	1514.46	-0.505814	0.198679	-2.54589	0.0108999	0.218506	-1.41992
	ZNF365	22891	zinc finger protein 365	71.9355	0.693541	0.272426	2.5458	0.0109028	0.218506	1.61725
	FHL2	2274	four and a half LIM domains 2	4440.38	0.379529	0.149313	2.54183	0.0110274	0.220416	1.30092
	SLC43A1	8501	solute carrier family 43 (amino acid system L transporter), member 1	622.598	-0.462605	0.181979	-2.54208	0.0110194	0.220416	-1.37803
	EIF2AK2	5610	eukaryotic translation initiation factor 2-alpha kinase 2	890.838	0.64845	0.255315	2.5398	0.0110914	0.220816	1.56748
	RASGEF1B	153020	RasGEF domain family, member 1B	892.816	0.443406	0.174615	2.53934	0.0111061	0.220816	1.35981
	SNCA	6622	synuclein, alpha (non A4 component of amyloid precursor)	434.12	0.499994	0.196873	2.53968	0.0110955	0.220816	1.41421
	TNK1	8711	tyrosine kinase, non-receptor, 1	1707.18	0.495899	0.195217	2.54024	0.0110775	0.220816	1.4102
	KLK13	26085	kallikrein-related peptidase 13	806.309	-0.683051	0.269209	-2.53725	0.0111727	0.221847	-1.60553
	ARMC9	80210	armadillo repeat containing 9	422.733	0.508159	0.200669	2.53232	0.0113311	0.2245	1.42223
	CD163	9332	CD163 molecule	132.752	-0.657214	0.259547	-2.53216	0.0113361	0.2245	-1.57703
	ADORA2B	136	adenosine A2b receptor	679.84	-0.462344	0.182749	-2.52994	0.0114082	0.225491	-1.37778
	SLC27A6	28965	solute carrier family 27 (fatty acid transporter), member 6	49.1881	0.707556	0.2797	2.5297	0.0114161	0.225491	1.63304
	KIF24	347240	kinesin family member 24	140.639	-0.654474	0.258855	-2.52834	0.0114604	0.226069	-1.57404
	DPYSL3	1809	dihydropyrimidinase-like 3	1999.74	0.574388	0.227359	2.52635	0.0115253	0.227052	1.48905
	ADAMTS10	81794	ADAM metallopeptidase with thrombospondin type 1 motif, 10	613.376	0.673375	0.266727	2.52458	0.0115836	0.227654	1.5948
	OCIAD2	132299	OCIA domain containing 2	1354.93	0.42694	0.169118	2.5245	0.0115861	0.227654	1.34438
	CSGALNACT2	55454	chondroitin sulfate N-acetylgalactosaminyltransferase 2	978.459	0.469209	0.186284	2.51878	0.0117762	0.23099	1.38435
	HKDC1	80201	hexokinase domain containing 1	28.8965	-0.633462	0.251529	-2.51844	0.0117876	0.23099	-1.55128
	LOC100288637	100288637	OTU deubiquitinase 7A pseudogene	209.436	-0.63921	0.25394	-2.51717	0.0118303	0.23099	-1.55748
	MT2A	4502	metallothionein 2A	18745.5	-0.596998	0.23722	-2.51664	0.011848	0.23099	-1.51257
	NKPD1	284353	NTPase, KAP family P-loop domain containing 1	540.723	-0.476256	0.189205	-2.51715	0.0118309	0.23099	-1.39113
	SPRR1B	6699	small proline-rich protein 1B	25361	-0.632593	0.251331	-2.51697	0.0118367	0.23099	-1.55035
	S100A7	6278	S100 calcium binding protein A7	144596	-0.429479	0.170806	-2.51443	0.0119226	0.231942	-1.34675
	TNS3	64759	tensin 3	2276.6	0.606468	0.24121	2.51428	0.0119277	0.231942	1.52253
	AQPEP	NA	NA	74.8399	-0.702969	0.279761	-2.51275	0.0119796	0.232351	-1.62785
	FOXF2	2295	forkhead box F2	169.076	0.613291	0.244058	2.51289	0.0119748	0.232351	1.52974
	NPEPL1	79716	aminopeptidase-like 1	43.9437	0.702609	0.279792	2.51118	0.0120328	0.233082	1.62745
	TUBA1B	10376	tubulin, alpha 1b	10276	-0.351463	0.140082	-2.50898	0.0121081	0.234241	-1.27585
	C5AR1	728	complement component 5a receptor 1	146.998	-0.614269	0.245047	-2.50674	0.012185	0.235426	-1.53078
	MT1G	4495	metallothionein 1G	230.412	-0.608902	0.242965	-2.50613	0.012206	0.235529	-1.5251
	FARP1	10160	FERM, RhoGEF (ARHGEF) and pleckstrin domain protein 1 (chondrocyte-derived)	1593.85	0.602776	0.24067	2.50458	0.0122598	0.235963	1.51864
	RTP4	64108	receptor (chemosensory) transporter protein 4	178.822	0.681604	0.272144	2.50457	0.0122599	0.235963	1.60392
	HPGD	3248	hydroxyprostaglandin dehydrogenase 15-(NAD)	1014.68	-0.547007	0.218452	-2.50401	0.0122793	0.236036	-1.46105
	HOXB2	3212	homeobox B2	330.387	0.551446	0.220317	2.50296	0.0123159	0.236363	1.46555
	PCDH17	27253	protocadherin 17	45.9425	0.697552	0.278729	2.50262	0.0123278	0.236363	1.62175
	MT1E	4493	metallothionein 1E	2570.48	-0.469145	0.187653	-2.50007	0.0124168	0.237465	-1.38429
	SOX10	6663	SRY (sex determining region Y)-box 10	693.725	0.447986	0.179169	2.50036	0.0124069	0.237465	1.36413
	ACCS	84680	1-aminocyclopropane-1-carboxylate synthase homolog (Arabidopsis)(non-functional)	461.967	-0.519928	0.208078	-2.49871	0.0124646	0.237883	-1.43388
	SMPD1	6609	sphingomyelin phosphodiesterase 1, acid lysosomal	1851.36	-0.40051	0.160297	-2.49855	0.0124703	0.237883	-1.31997
	DIXDC1	85458	DIX domain containing 1	397.452	0.678667	0.271789	2.49704	0.0125235	0.238597	1.60066
	DKC1	1736	dyskeratosis congenita 1, dyskerin	3858.16	-0.368661	0.147677	-2.49641	0.0125459	0.238721	-1.29115
	MAPK4	5596	mitogen-activated protein kinase 4	81.0654	0.660459	0.264743	2.49472	0.0126058	0.239255	1.58059
	SRGAP3	9901	SLIT-ROBO Rho GTPase activating protein 3	407.616	-0.572	0.229284	-2.49472	0.0126056	0.239255	-1.48658
	TMEM173	340061	transmembrane protein 173	3544.32	0.447831	0.179564	2.494	0.0126314	0.239439	1.36399
	ABTB2	25841	ankyrin repeat and BTB (POZ) domain containing 2	588.924	0.557807	0.223933	2.49095	0.0127402	0.241199	1.47203
	LINC01279	100506621	long intergenic non-protein coding RNA 1279	220.483	0.685398	0.275288	2.48975	0.0127834	0.241712	1.60815
	EPDR1	54749	ependymin related 1	176.602	0.626193	0.251615	2.48869	0.0128214	0.241905	1.54349
	EXOC3L1	283849	exocyst complex component 3-like 1	167.93	0.676444	0.27182	2.48857	0.0128257	0.241905	1.5982
	DIAPH3	81624	diaphanous-related formin 3	94.1985	-0.671409	0.26999	-2.48679	0.0128901	0.242511	-1.59263
	GEN1	348654	GEN1 Holliday junction 5' flap endonuclease	520.64	-0.50676	0.203763	-2.487	0.0128824	0.242511	-1.42086
	ITGA11	22801	integrin, alpha 11	83.1736	0.666883	0.268393	2.48473	0.012965	0.243616	1.58764
	FAM101B	359845	family with sequence similarity 101, member B	902.106	0.489788	0.197171	2.48408	0.0129888	0.243759	1.40424
	KCTD11	147040	potassium channel tetramerization domain containing 11	3885.77	0.368079	0.148282	2.4823	0.0130539	0.244371	1.29063
	KIF22	3835	kinesin family member 22	2361.7	-0.498017	0.200608	-2.48254	0.0130449	0.244371	-1.41227
	TUBA1A	7846	tubulin, alpha 1a	3997.08	0.466287	0.187897	2.48161	0.0130791	0.244538	1.38155
	HLA-B	3106	major histocompatibility complex, class I, B	55950.5	0.415252	0.167371	2.48103	0.0131004	0.244633	1.33353
	DAPK1	1612	death-associated protein kinase 1	934.025	0.495236	0.19984	2.47816	0.0132062	0.246303	1.40955
	LRRC20	55222	leucine rich repeat containing 20	510.753	-0.588799	0.238102	-2.47289	0.0134027	0.249349	-1.50399
	MOV10L1	54456	Mov10 RISC complex RNA helicase like 1	33.3874	0.685321	0.277109	2.47311	0.0133943	0.249349	1.60806
	ERCC6L	54821	excision repair cross-complementation group 6-like	85.1385	-0.680879	0.275485	-2.47156	0.0134524	0.249965	-1.60312
	TXNIP	10628	thioredoxin interacting protein	20368.3	0.507774	0.205625	2.46942	0.0135331	0.251156	1.42185
	C15orf59	388135	chromosome 15 open reading frame 59	762.652	-0.44165	0.178994	-2.4674	0.0136098	0.252215	-1.35816
	PTPRN	5798	protein tyrosine phosphatase, receptor type, N	53.325	0.667879	0.270748	2.46679	0.0136331	0.252215	1.58874
	RNASEH2A	10535	ribonuclease H2, subunit A	711.465	-0.457222	0.185366	-2.46659	0.0136405	0.252215	-1.3729
	SLC9A9	285195	solute carrier family 9, subfamily A (NHE9, cation proton antiporter 9), member 9	566.468	-0.516015	0.209318	-2.46522	0.0136928	0.252871	-1.43
	LCE1D	353134	late cornified envelope 1D	1189.55	-0.664793	0.269773	-2.46427	0.0137292	0.253234	-1.58534
	PI3	5266	peptidase inhibitor 3, skin-derived	24502.3	-0.673145	0.273228	-2.46368	0.013752	0.253343	-1.59454
	EPSTI1	94240	epithelial stromal interaction 1 (breast)	1152.98	0.688782	0.279713	2.46246	0.0137987	0.253874	1.61192
	PSEN2	5664	presenilin 2	597.039	-0.448	0.181991	-2.46167	0.0138292	0.253874	-1.36415
	SDK2	54549	sidekick cell adhesion molecule 2	210.934	0.670988	0.272581	2.46161	0.0138314	0.253874	1.59216
	ATP6V0A4	50617	ATPase, H+ transporting, lysosomal V0 subunit a4	303.058	0.687867	0.279707	2.45924	0.0139232	0.255247	1.6109
	SYTL5	94122	synaptotagmin-like 5	67.6873	0.688331	0.27999	2.45842	0.0139551	0.255522	1.61142
	MYO1G	64005	myosin IG	514.479	0.493001	0.200588	2.45778	0.0139797	0.25566	1.40737
	IL15	3600	interleukin 15	202.15	0.560892	0.228317	2.45663	0.0140246	0.256169	1.47518
	CD207	50489	CD207 molecule, langerin	3282.89	0.63327	0.258433	2.45043	0.0142687	0.259683	1.55108
	CLIC4	25932	chloride intracellular channel 4	5459.29	0.555922	0.226842	2.4507	0.0142578	0.259683	1.47011
	CYSLTR2	57105	cysteinyl leukotriene receptor 2	98.9089	0.64777	0.26434	2.45052	0.014265	0.259683	1.56674
	MBNL2	10150	muscleblind-like splicing regulator 2	1064.12	0.436937	0.178399	2.44921	0.014317	0.260248	1.35373
	NLRC5	84166	NLR family, CARD domain containing 5	4397.62	0.495993	0.202658	2.44744	0.0143873	0.26121	1.41029
	APOL1	8542	apolipoprotein L, 1	1709.9	0.552653	0.225917	2.44626	0.0144346	0.261753	1.46678
	HLA-DOB	3112	major histocompatibility complex, class II, DO beta	158.05	0.620382	0.253745	2.4449	0.0144892	0.262427	1.53728
	ESCO2	157570	establishment of sister chromatid cohesion N-acetyltransferase 2	82.5294	-0.680216	0.278269	-2.44445	0.0145072	0.262437	-1.60238
	SAMHD1	25939	SAM domain and HD domain 1	875.634	0.539447	0.220782	2.44334	0.014552	0.262931	1.45341
	SUV39H1	6839	suppressor of variegation 3-9 homolog 1 (Drosophila)	397.508	-0.539346	0.220786	-2.44284	0.0145723	0.262983	-1.45331
	LIPN	643418	lipase, family member N	204.022	-0.570274	0.233532	-2.44195	0.0146081	0.263313	-1.48481
	ATP6V1B2	526	ATPase, H+ transporting, lysosomal 56/58kDa, V1 subunit B2	6308.76	-0.339953	0.139369	-2.43923	0.0147185	0.264353	-1.26572
	GPSM2	29899	G-protein signaling modulator 2	1954.91	-0.437581	0.179379	-2.43942	0.0147107	0.264353	-1.35433
	THRA	7067	thyroid hormone receptor, alpha	1362.95	0.440755	0.180646	2.43989	0.0146919	0.264353	1.35731
	CD109	135228	CD109 molecule	2598.21	0.374508	0.153679	2.43696	0.0148114	0.265389	1.2964
	MAP1S	55201	microtubule-associated protein 1S	930.286	0.556073	0.228179	2.437	0.0148096	0.265389	1.47026
	FOXN1	8456	forkhead box N1	850.729	-0.54846	0.225112	-2.43639	0.0148348	0.265493	-1.46252
	TMEM98	26022	transmembrane protein 98	1017.61	0.484554	0.198945	2.43562	0.0148662	0.265738	1.39915
	ATIC	471	5-aminoimidazole-4-carboxamide ribonucleotide formyltransferase/IMP cyclohydrolase	2492.51	-0.38432	0.157934	-2.43343	0.0149565	0.266719	-1.30524
	BEND6	221336	BEN domain containing 6	69.3117	0.680706	0.27973	2.43344	0.014956	0.266719	1.60292
	EFCAB4A	NA	NA	399.404	0.678292	0.278954	2.43155	0.0150342	0.267787	1.60024
	RGMA	56963	repulsive guidance molecule family member a	596.72	0.537304	0.221141	2.42969	0.0151119	0.268852	1.45126
	ANO1	55107	anoctamin 1, calcium activated chloride channel	594.982	0.578876	0.238404	2.42813	0.0151768	0.269688	1.49369
	C16orf74	404550	chromosome 16 open reading frame 74	171.92	-0.608581	0.251128	-2.42339	0.0153763	0.27259	-1.52476
	KIF12	113220	kinesin family member 12	117.494	0.668615	0.275862	2.42373	0.015362	0.27259	1.58955
	APOL6	80830	apolipoprotein L, 6	1280.35	0.621982	0.257047	2.41972	0.0155325	0.274389	1.53899
	ARL5A	26225	ADP-ribosylation factor-like 5A	1325.49	-0.424056	0.175207	-2.42031	0.0155074	0.274389	-1.34169
	OXCT1	5019	3-oxoacid CoA transferase 1	1749.79	-0.470095	0.19425	-2.42005	0.0155184	0.274389	-1.3852
	NRIP1	8204	nuclear receptor interacting protein 1	965.084	0.445503	0.184263	2.41776	0.0156165	0.275549	1.36179
	COX6B2	125965	cytochrome c oxidase subunit VIb polypeptide 2 (testis)	288.766	0.552719	0.229034	2.41326	0.0158105	0.278322	1.46685
	MUC5B	727897	mucin 5B, oligomeric mucus/gel-forming	112.756	0.67088	0.277997	2.41326	0.0158106	0.278322	1.59204
	HSPA13	6782	heat shock protein 70kDa family, member 13	397.536	0.488415	0.202511	2.4118	0.0158741	0.279113	1.4029
	NDST1	3340	N-deacetylase/N-sulfotransferase (heparan glucosaminyl) 1	11791.7	0.346301	0.143627	2.41112	0.0159036	0.279307	1.2713
	KIRREL	55243	kin of IRRE like (Drosophila)	3684.11	0.422185	0.175456	2.40622	0.0161187	0.282754	1.33996
	MAP3K2	10746	mitogen-activated protein kinase kinase kinase 2	1661.56	0.379142	0.157798	2.4027	0.0162744	0.284489	1.30057
	MAPKAPK3	7867	mitogen-activated protein kinase-activated protein kinase 3	4896.13	-0.46439	0.193277	-2.40271	0.0162739	0.284489	-1.37973
	ZNF618	114991	zinc finger protein 618	385.005	0.516868	0.215113	2.40277	0.0162714	0.284489	1.43085
	ZNF229	7772	zinc finger protein 229	214.47	0.569497	0.23728	2.4001	0.0163904	0.286185	1.48401
	IER3	8870	immediate early response 3	12195.5	0.54954	0.229035	2.39938	0.0164231	0.286424	1.46362
	LMNB2	84823	lamin B2	4265.55	-0.439246	0.183247	-2.39701	0.0165293	0.287942	-1.3559
	JAM3	83700	junctional adhesion molecule 3	1855.24	0.530958	0.2216	2.39602	0.0165742	0.288305	1.44489
	MX2	4600	MX dynamin-like GTPase 2	1375.84	0.631245	0.26349	2.39571	0.0165884	0.288305	1.5489
	PSG7	5676	pregnancy specific beta-1-glycoprotein 7 (gene/pseudogene)	46.7622	-0.660612	0.276029	-2.39327	0.0166988	0.289888	-1.58075
	CCDC102A	92922	coiled-coil domain containing 102A	421.493	0.505941	0.211525	2.39187	0.0167627	0.290662	1.42005
	ACVR1	90	activin A receptor, type I	1555.57	0.467472	0.195635	2.38951	0.0168708	0.291782	1.38268
	APLNR	187	apelin receptor	1699.63	0.536367	0.224539	2.38875	0.016906	0.291782	1.45032
	CMA1	1215	chymase 1, mast cell	140.757	-0.665132	0.27849	-2.38835	0.0169241	0.291782	-1.58571
	GBA	2629	glucosidase, beta, acid	1948.13	-0.43124	0.180511	-2.38899	0.0168946	0.291782	-1.34839
	IL32	9235	interleukin 32	1451.69	0.540098	0.225998	2.38984	0.0168559	0.291782	1.45407
	CCDC129	223075	coiled-coil domain containing 129	116.401	0.645638	0.270426	2.38749	0.0169639	0.292132	1.56443
	ADAMTS7	11173	ADAM metallopeptidase with thrombospondin type 1 motif, 7	548.972	0.651619	0.27319	2.38522	0.0170687	0.29307	1.57093
	ASPH	444	aspartate beta-hydroxylase	2373.49	0.401542	0.16842	2.38417	0.0171178	0.29307	1.32092
	CSF2RB	1439	colony stimulating factor 2 receptor, beta, low-affinity (granulocyte-macrophage)	558.025	0.533877	0.223961	2.38379	0.0171352	0.29307	1.44781
	NEIL3	55247	nei endonuclease VIII-like 3 (E. coli)	85.1992	-0.667522	0.280016	-2.38387	0.0171315	0.29307	-1.58834
	STK17B	9262	serine/threonine kinase 17b	983.321	0.432504	0.181396	2.38431	0.0171114	0.29307	1.34957
	VGLL4	9686	vestigial-like family member 4	2162.86	0.409282	0.171598	2.38512	0.0170733	0.29307	1.32803
	CERK	64781	ceramide kinase	2871.89	0.435648	0.182817	2.38298	0.0171733	0.293389	1.35252
	SNHG1	23642	small nucleolar RNA host gene 1	3934.47	-0.344946	0.144896	-2.38064	0.0172825	0.294919	-1.2701
	PLA2G4A	5321	phospholipase A2, group IVA (cytosolic, calcium-dependent)	636.922	-0.535434	0.225053	-2.37915	0.0173527	0.295781	-1.44938
	PPIF	10105	peptidylprolyl isomerase F	4600.1	-0.479253	0.20157	-2.3776	0.0174256	0.296689	-1.39402
	MLC1	23209	megalencephalic leukoencephalopathy with subcortical cysts 1	54.6388	0.662423	0.278756	2.37636	0.0174845	0.297355	1.58274
	AUNIP	79000	aurora kinase A and ninein interacting protein	49.2389	-0.656268	0.276499	-2.37349	0.0176208	0.298997	-1.576
	HOPX	84525	HOP homeobox	14554.1	-0.469766	0.197905	-2.37369	0.0176112	0.298997	-1.38488
	NT5E	4907	5'-nucleotidase, ecto (CD73)	2159.7	0.405072	0.17072	2.37272	0.0176575	0.299283	1.32415
	CTSL	1514	cathepsin L	7953.99	-0.357496	0.150703	-2.37219	0.0176829	0.299376	-1.2812
	FLNC	2318	filamin C, gamma	338.038	0.612368	0.258321	2.37058	0.0177604	0.30035	1.52877
	NOS2	4843	nitric oxide synthase 2, inducible	46.8659	0.647988	0.273427	2.36988	0.017794	0.300519	1.56698
	TNF	7124	tumor necrosis factor	456.044	0.491888	0.207588	2.36954	0.0178103	0.300519	1.40628
	S100A9	6280	S100 calcium binding protein A9	315103	-0.473552	0.199954	-2.36831	0.0178698	0.301185	-1.38852
	LCA5	167691	Leber congenital amaurosis 5	51.8499	0.662139	0.279755	2.36685	0.01794	0.30174	1.58243
	TBC1D16	125058	TBC1 domain family, member 16	3318.48	0.346946	0.146589	2.3668	0.0179428	0.30174	1.27187
	APOBEC3F	200316	apolipoprotein B mRNA editing enzyme, catalytic polypeptide-like 3F	128.416	0.640372	0.270856	2.36426	0.0180662	0.303176	1.55873
	GOLGA8B	440270	golgin A8 family, member B	1259.8	-0.419431	0.177409	-2.36421	0.0180685	0.303176	-1.3374
	ALDH3B1	221	aldehyde dehydrogenase 3 family, member B1	383.768	-0.469823	0.199157	-2.35906	0.0183215	0.306793	-1.38494
	MVK	4598	mevalonate kinase	2536.1	-0.482352	0.204474	-2.35899	0.0183248	0.306793	-1.39702
	NNT-AS1	100652772	NNT antisense RNA 1	93.1476	0.639754	0.27125	2.35854	0.0183471	0.306825	1.55806
	ERAP1	51752	endoplasmic reticulum aminopeptidase 1	2204.35	0.528103	0.224229	2.35519	0.0185131	0.308611	1.44203
	MS4A6A	64231	membrane-spanning 4-domains, subfamily A, member 6A	41.4927	-0.593669	0.252055	-2.35531	0.0185072	0.308611	-1.50908
	TRMT6	51605	tRNA methyltransferase 6	932.18	-0.404056	0.171563	-2.35515	0.0185154	0.308611	-1.32322
	SH3RF1	57630	SH3 domain containing ring finger 1	768.469	0.543598	0.230867	2.35459	0.0185431	0.30873	1.4576
	HYAL1	3373	hyaluronoglucosaminidase 1	1833.04	-0.423004	0.179797	-2.35268	0.0186389	0.309982	-1.34072
	SEMA6D	80031	sema domain, transmembrane domain (TM), and cytoplasmic domain, (semaphorin) 6D	485.742	0.631972	0.2691	2.34847	0.0188507	0.313159	1.54968
	TMEM184B	25829	transmembrane protein 184B	2898.23	0.344781	0.146905	2.34697	0.0189267	0.314074	1.26996
	ROBO3	64221	roundabout, axon guidance receptor, homolog 3 (Drosophila)	577.552	0.557241	0.237604	2.34525	0.0190141	0.315177	1.47145
	GPRC5C	55890	G protein-coupled receptor, class C, group 5, member C	2079.09	0.407485	0.173835	2.3441	0.0190733	0.315464	1.32637
	WBSCR27	155368	Williams Beuren syndrome chromosome region 27	61.3712	0.655118	0.279444	2.34437	0.0190594	0.315464	1.57474
	ENTPD2	954	ectonucleoside triphosphate diphosphohydrolase 2	363.073	-0.59665	0.254619	-2.3433	0.0191138	0.315787	-1.5122
	ATP13A2	23400	ATPase type 13A2	3802.26	0.365299	0.156065	2.34068	0.0192487	0.316971	1.28815
	WFDC12	128488	WAP four-disulfide core domain 12	1206.82	-0.624014	0.266534	-2.34122	0.0192208	0.316971	-1.54116
	ZNF423	23090	zinc finger protein 423	74.1238	0.652354	0.27869	2.34079	0.019243	0.316971	1.57173
	TTC39A	22996	tetratricopeptide repeat domain 39A	1618.17	-0.482199	0.20605	-2.3402	0.0192735	0.317033	-1.39687
	CCNE2	9134	cyclin E2	111.749	-0.625187	0.26746	-2.3375	0.0194134	0.318986	-1.54241
	GCNT2	2651	glucosaminyl (N-acetyl) transferase 2, I-branching enzyme (I blood group)	289.849	0.567176	0.242828	2.33571	0.0195065	0.320166	1.48162
	KIAA0020	9933	KIAA0020	1880.15	-0.405562	0.173685	-2.33504	0.0195412	0.320386	-1.32461
	FLJ22447	400221	uncharacterized LOC400221	42.9891	0.64953	0.27832	2.33375	0.0196088	0.321145	1.56866
	IL36RN	26525	interleukin 36 receptor antagonist	3463.95	-0.499267	0.214107	-2.33185	0.0197084	0.321944	-1.4135
	LTB	4050	lymphotoxin beta (TNF superfamily, member 3)	312.087	0.590922	0.253356	2.33238	0.0196806	0.321944	1.50621
	SPRR1A	6698	small proline-rich protein 1A	7652.54	-0.558735	0.239636	-2.3316	0.0197218	0.321944	-1.47298
	METTL7A	25840	methyltransferase like 7A	942.892	-0.436737	0.1874	-2.3305	0.0197796	0.322539	-1.35354
	CARD6	84674	caspase recruitment domain family, member 6	676.48	0.453934	0.19486	2.32953	0.0198308	0.323023	1.36977
	LPPR4	9890	lipid phosphate phosphatase-related protein type 4	187.001	0.639731	0.274848	2.32758	0.0199343	0.324358	1.55804
	USP54	159195	ubiquitin specific peptidase 54	2081.19	0.354935	0.152524	2.32708	0.0199609	0.324439	1.27893
	TCP11L1	55346	t-complex 11, testis-specific-like 1	482.165	0.444003	0.190841	2.32656	0.0199889	0.324544	1.36037
	LGR4	55366	leucine-rich repeat containing G protein-coupled receptor 4	804.582	0.554359	0.23854	2.32397	0.0201273	0.326439	1.46852
	CHD3	1107	chromodomain helicase DNA binding protein 3	10063.1	0.33991	0.146424	2.32142	0.0202644	0.327604	1.26568
	PP7080	25845	uncharacterized LOC25845	1460.24	-0.390957	0.16838	-2.32187	0.0202399	0.327604	-1.31126
	SUV39H2	79723	suppressor of variegation 3-9 homolog 2 (Drosophila)	266.928	-0.496506	0.213849	-2.32176	0.020246	0.327604	-1.41079
	NEK6	10783	NIMA-related kinase 6	765.426	0.530482	0.228564	2.32094	0.0202901	0.327668	1.44441
	GNA12	2768	guanine nucleotide binding protein (G protein) alpha 12	2016.02	0.423453	0.182828	2.31613	0.0205511	0.331527	1.34113
	FBL	2091	fibrillarin	8340.71	-0.367783	0.158966	-2.3136	0.0206895	0.333237	-1.29037
	LINC00707	100507127	long intergenic non-protein coding RNA 707	163.65	-0.607988	0.262813	-2.31339	0.0207014	0.333237	-1.52413
	DBF4	10926	DBF4 zinc finger	233.635	-0.514611	0.222623	-2.31158	0.020801	0.334259	-1.42861
	LINC00987	100499405	long intergenic non-protein coding RNA 987	110.805	0.625411	0.270621	2.31102	0.0208315	0.334259	1.54265
	ZBED2	79413	zinc finger, BED-type containing 2	357.402	-0.619871	0.268196	-2.31126	0.0208185	0.334259	-1.53674
	CPNE7	27132	copine VII	109.62	-0.626262	0.271081	-2.31024	0.0208748	0.334597	-1.54356
	PTGFRN	5738	prostaglandin F2 receptor inhibitor	7359.76	0.480029	0.207923	2.30868	0.0209613	0.335627	1.39477
	STAT2	6773	signal transducer and activator of transcription 2, 113kDa	8927.65	0.489287	0.212012	2.30783	0.0210085	0.336025	1.40375
	ANKRD54	129138	ankyrin repeat domain 54	1196.16	-0.390145	0.16919	-2.30595	0.0211132	0.336626	-1.31053
	CARD10	29775	caspase recruitment domain family, member 10	1838.61	-0.352709	0.152948	-2.30607	0.0211069	0.336626	-1.27696
	IGFBP3	3486	insulin-like growth factor binding protein 3	18247.7	0.562	0.243636	2.30672	0.0210706	0.336626	1.47631
	ABO	28	ABO blood group (transferase A, alpha 1-3-N-acetylgalactosaminyltransferase; transferase B, alpha 1-3-galactosyltransferase)	77.7974	0.640143	0.277813	2.30422	0.0212103	0.337816	1.55848
	SLC25A25	114789	solute carrier family 25 (mitochondrial carrier; phosphate carrier), member 25	1385.75	-0.368693	0.160041	-2.30374	0.0212371	0.337886	-1.29118
	LOC101926963	101926963	uncharacterized LOC101926963	88.3677	0.627685	0.272515	2.30331	0.0212617	0.337919	1.54508
	EN1	2019	engrailed homeobox 1	395.019	0.61612	0.267556	2.30277	0.0212918	0.338042	1.53275
	LOXL2	4017	lysyl oxidase-like 2	1151.38	0.533488	0.232173	2.2978	0.0215729	0.342143	1.44742
	MCM5	4174	minichromosome maintenance complex component 5	1924.38	-0.365764	0.159309	-2.29594	0.0216793	0.343468	-1.28856
	ABLIM1	3983	actin binding LIM protein 1	10503.1	-0.375579	0.163803	-2.29287	0.0218555	0.345171	-1.29736
	CKS1B	1163	CDC28 protein kinase regulatory subunit 1B	230.896	-0.522302	0.227794	-2.29287	0.0218556	0.345171	-1.43625
	KDR	3791	kinase insert domain receptor	1555.94	0.61135	0.266619	2.29297	0.0218496	0.345171	1.52769
	LAMP3	27074	lysosomal-associated membrane protein 3	990.328	0.604275	0.263679	2.29171	0.0219225	0.345865	1.52021
	KRT10	3858	keratin 10, type I	269898	-0.542666	0.23705	-2.28924	0.0220652	0.347583	-1.45666
	SFXN4	119559	sideroflexin 4	721.42	-0.545661	0.238381	-2.28903	0.0220776	0.347583	-1.45969
	HSPA12A	259217	heat shock 70kDa protein 12A	592.627	0.484506	0.211859	2.28692	0.0222003	0.34915	1.39911
	ITGB1	3688	integrin, beta 1 (fibronectin receptor, beta polypeptide, antigen CD29 includes MDF2, MSK12)	6511.28	0.483179	0.211458	2.28498	0.0223139	0.350571	1.39782
	EMC3-AS1	442075	EMC3 antisense RNA 1	429.334	-0.510853	0.223624	-2.28443	0.0223464	0.350714	-1.42489
	EMILIN1	11117	elastin microfibril interfacer 1	1111.83	0.551883	0.241646	2.28385	0.0223802	0.350879	1.466
	TMCO3	55002	transmembrane and coiled-coil domains 3	2025.83	0.420301	0.184068	2.2834	0.0224069	0.350932	1.33821
	DDX39A	10212	DEAD (Asp-Glu-Ala-Asp) box polypeptide 39A	4283.19	-0.332134	0.14555	-2.28192	0.0224941	0.351612	-1.25887
	HERC2P3	283755	hect domain and RLD 2 pseudogene 3	30.7253	-0.447954	0.19631	-2.28187	0.022497	0.351612	-1.3641
	MEX3D	399664	mex-3 RNA binding family member D	967.406	0.455587	0.199808	2.28012	0.0226003	0.352495	1.37134
	TCF19	6941	transcription factor 19	1174.9	-0.426409	0.187001	-2.28024	0.0225932	0.352495	-1.34388
	DLGAP4	22839	discs, large (Drosophila) homolog-associated protein 4	6121.3	0.410367	0.180362	2.27524	0.0228915	0.356042	1.32902
	SDC2	6383	syndecan 2	776.877	0.602713	0.264915	2.27512	0.0228987	0.356042	1.51857
	SPIN4	139886	spindlin family, member 4	283.525	-0.52511	0.230805	-2.27513	0.0228983	0.356042	-1.43904
	SIGLEC1	6614	sialic acid binding Ig-like lectin 1, sialoadhesin	121.222	-0.579871	0.254938	-2.27456	0.0229324	0.356198	-1.49472
	TP53INP2	58476	tumor protein p53 inducible nuclear protein 2	1056.44	0.419121	0.184306	2.27405	0.0229629	0.356304	1.33711
	TRIM5	85363	tripartite motif containing 5	1296.06	0.487654	0.214519	2.27324	0.0230115	0.35669	1.40216
	PLCD1	5333	phospholipase C, delta 1	1888.37	-0.401836	0.176844	-2.27226	0.0230706	0.357238	-1.32119
	CXCL1	2919	chemokine (C-X-C motif) ligand 1 (melanoma growth stimulating activity, alpha)	2109.04	-0.597912	0.263547	-2.26871	0.0232861	0.360205	-1.51352
	AOX1	316	aldehyde oxidase 1	831.098	-0.521804	0.23009	-2.26782	0.0233399	0.360418	-1.43575
	GPR183	1880	G protein-coupled receptor 183	132.523	0.59819	0.263916	2.26659	0.0234151	0.360418	1.51382
	HCG4B	80868	HLA complex group 4B (non-protein coding)	304.138	0.604432	0.266584	2.26732	0.0233705	0.360418	1.52038
	PTX3	5806	pentraxin 3, long	285.098	-0.630913	0.278362	-2.26652	0.0234196	0.360418	-1.54854
	UHRF1	29128	ubiquitin-like with PHD and ring finger domains 1	265.943	-0.526353	0.232158	-2.26722	0.0233766	0.360418	-1.44028
	MXRA7	439921	matrix-remodelling associated 7	2000.42	0.477981	0.210938	2.26598	0.0234524	0.360554	1.39279
	NET1	10276	neuroepithelial cell transforming 1	2773.58	0.330246	0.145854	2.26423	0.0235597	0.361834	1.25723
	SNRPD1	6632	small nuclear ribonucleoprotein D1 polypeptide 16kDa	1574.1	-0.360167	0.159099	-2.26379	0.0235871	0.361886	-1.28357
	CCR1	1230	chemokine (C-C motif) receptor 1	105.58	-0.592509	0.261948	-2.26193	0.0237014	0.363269	-1.50787
	PHTF1	10745	putative homeodomain transcription factor 1	270.942	0.544389	0.240749	2.26123	0.0237451	0.363568	1.4584
	WTIP	126374	Wilms tumor 1 interacting protein	430.664	0.452821	0.200453	2.25899	0.0238838	0.365321	1.36871
	MKL1	57591	megakaryoblastic leukemia (translocation) 1	2041.49	0.362363	0.160495	2.25778	0.0239593	0.365361	1.28553
	PNPLA1	285848	patatin-like phospholipase domain containing 1	610.023	-0.538861	0.238665	-2.25781	0.0239574	0.365361	-1.45283
	SLC6A17	388662	solute carrier family 6 (neutral amino acid transporter), member 17	440.66	0.572662	0.253595	2.25817	0.023935	0.365361	1.48726
	FMOD	2331	fibromodulin	2442.26	0.422944	0.187482	2.25592	0.0240755	0.36639	1.34066
	MIR4697HG	283174	MIR4697 host gene	1279.3	0.430422	0.190774	2.25618	0.0240591	0.36639	1.34763
	HOXB3	3213	homeobox B3	384.275	0.522664	0.231764	2.25516	0.0241233	0.366747	1.43661
	TWIST1	7291	twist family bHLH transcription factor 1	761.779	-0.597385	0.264959	-2.25463	0.0241566	0.366882	-1.51297
	CD93	22918	CD93 molecule	4326.43	0.605122	0.268583	2.25302	0.0242578	0.367678	1.52111
	SIPA1L3	23094	signal-induced proliferation-associated 1 like 3	2293.08	0.373584	0.165806	2.25314	0.0242505	0.367678	1.29557
	COL9A3	1299	collagen, type IX, alpha 3	362.929	0.550269	0.244556	2.25008	0.0244441	0.369677	1.46436
	SCFD2	152579	sec1 family domain containing 2	743.977	-0.429271	0.190806	-2.24977	0.0244634	0.369677	-1.34655
	SPEG	10290	SPEG complex locus	609.812	0.570689	0.253647	2.24994	0.024453	0.369677	1.48523
	NDFIP1	80762	Nedd4 family interacting protein 1	2460.81	0.336182	0.149626	2.24682	0.0246516	0.371775	1.26241
	ZSCAN31	64288	zinc finger and SCAN domain containing 31	483.481	0.533218	0.237285	2.24716	0.0246296	0.371775	1.44715
	ENPP2	5168	ectonucleotide pyrophosphatase/phosphodiesterase 2	1079.29	-0.598218	0.266529	-2.24448	0.0248017	0.37329	-1.51385
	KCNE4	23704	potassium channel, voltage gated subfamily E regulatory beta subunit 4	872.981	0.609283	0.271439	2.24464	0.024791	0.37329	1.5255
	C1QTNF1	114897	C1q and tumor necrosis factor related protein 1	2037.85	0.353689	0.157739	2.24224	0.0249461	0.37369	1.27782
	DDIT4	54541	DNA-damage-inducible transcript 4	11501.4	0.402564	0.179545	2.24214	0.0249524	0.37369	1.32185
	GLI2	2736	GLI family zinc finger 2	181.334	0.626191	0.279252	2.24239	0.0249363	0.37369	1.54348
	MIR612	693197	microRNA 612	81.7601	-0.624431	0.278422	-2.24275	0.0249127	0.37369	-1.5416
	TNFRSF9	3604	tumor necrosis factor receptor superfamily, member 9	45.4258	0.627803	0.279977	2.24234	0.0249394	0.37369	1.54521
	ZSWIM4	65249	zinc finger, SWIM-type containing 4	1431.51	0.352698	0.157336	2.24168	0.0249818	0.373758	1.27695
	MFSD4	148808	major facilitator superfamily domain containing 4	532.144	0.626695	0.279721	2.24043	0.0250632	0.374605	1.54402
	BMP2	650	bone morphogenetic protein 2	1917.05	0.577599	0.258165	2.23733	0.025265	0.376627	1.49236
	BSN	8927	bassoon presynaptic cytomatrix protein	42.6802	0.626053	0.28003	2.23567	0.0253737	0.376627	1.54334
	CYP26B1	56603	cytochrome P450, family 26, subfamily B, polypeptide 1	2732.07	0.427171	0.19091	2.23756	0.02525	0.376627	1.34459
	EGR3	1960	early growth response 3	1182.97	-0.475774	0.21279	-2.23588	0.0253597	0.376627	-1.39066
	LY6E	4061	lymphocyte antigen 6 complex, locus E	9093.41	0.549044	0.245527	2.23618	0.0253398	0.376627	1.46312
	RHOBTB1	9886	Rho-related BTB domain containing 1	269.512	0.527825	0.235942	2.23709	0.0252804	0.376627	1.44175
	SQLE	6713	squalene epoxidase	7437.95	-0.398598	0.17822	-2.23655	0.0253155	0.376627	-1.31823
	ADAT2	134637	adenosine deaminase, tRNA-specific 2	980.043	-0.440791	0.197215	-2.23508	0.0254122	0.376827	-1.35735
	SLC39A10	57181	solute carrier family 39 (zinc transporter), member 10	500.459	0.427304	0.19126	2.23415	0.0254733	0.37736	1.34472
	FAM86DP	692099	family with sequence similarity 86, member D, pseudogene	170.4	-0.54673	0.244984	-2.2317	0.0256351	0.379211	-1.46077
	LYL1	4066	lymphoblastic leukemia associated hematopoiesis regulator 1	182.288	0.59899	0.268426	2.23149	0.0256486	0.379211	1.51466
	AMMECR1	9949	Alport syndrome, mental retardation, midface hypoplasia and elliptocytosis chromosomal region gene 1	1230.21	-0.485696	0.217899	-2.22899	0.0258143	0.379412	-1.40026
	CLN8	2055	ceroid-lipofuscinosis, neuronal 8 (epilepsy, progressive with mental retardation)	1895.22	-0.34675	0.155567	-2.22895	0.0258175	0.379412	-1.27169
	DTX3L	151636	deltex 3 like, E3 ubiquitin ligase	3298.01	0.492936	0.221184	2.22863	0.0258387	0.379412	1.40731
	PRRT2	112476	proline-rich transmembrane protein 2	102.857	0.579647	0.260077	2.22875	0.0258303	0.379412	1.49448
	SH3BGRL	6451	SH3 domain binding glutamate-rich protein like	1146.34	0.37823	0.169668	2.22924	0.0257981	0.379412	1.29975
	WHSC1	7468	Wolf-Hirschhorn syndrome candidate 1	2625.62	-0.333515	0.149553	-2.23008	0.0257422	0.379412	-1.26008
	ZNF367	195828	zinc finger protein 367	144.208	-0.579501	0.259959	-2.2292	0.0258007	0.379412	-1.49433
	FAM117B	150864	family with sequence similarity 117, member B	302.877	0.478281	0.214745	2.2272	0.0259338	0.380438	1.39308
	ALOX12	239	arachidonate 12-lipoxygenase	506.705	-0.486951	0.218696	-2.22661	0.0259736	0.380651	-1.40148
	ORC1	4998	origin recognition complex, subunit 1	214.309	-0.542049	0.243615	-2.22502	0.02608	0.381839	-1.45604
	RAP2B	5912	RAP2B, member of RAS oncogene family	3122.74	0.437473	0.196851	2.22236	0.026259	0.383713	1.35423
	WISP1	8840	WNT1 inducible signaling pathway protein 1	310.059	0.516753	0.232504	2.22255	0.0262459	0.383713	1.43073
	DHCR24	1718	24-dehydrocholesterol reductase	37749	-0.402824	0.181374	-2.22095	0.026354	0.384194	-1.32209
	SKI	6497	SKI proto-oncogene	3911.53	0.35301	0.158914	2.22139	0.0263243	0.384194	1.27722
	SRPX2	27286	sushi-repeat containing protein, X-linked 2	443.423	0.564109	0.254018	2.22074	0.0263685	0.384194	1.47847
	FKBP5	2289	FK506 binding protein 5	1969.3	-0.609276	0.274635	-2.2185	0.0265209	0.386041	-1.52549
	TGFB1	7040	transforming growth factor, beta 1	4769.81	0.33727	0.152082	2.21768	0.0265766	0.386478	1.26336
	CHAC2	494143	ChaC, cation transport regulator homolog 2 (E. coli)	111.649	-0.578116	0.261	-2.215	0.0267599	0.387301	-1.4929
	HRNR	388697	hornerin	133.935	-0.613142	0.276865	-2.21459	0.0267881	0.387301	-1.52959
	IL1RL1	9173	interleukin 1 receptor-like 1	676.256	-0.617266	0.278667	-2.21507	0.0267554	0.387301	-1.53397
	KCNMB1	3779	potassium channel subfamily M regulatory beta subunit 1	82.0387	0.605471	0.273446	2.21422	0.0268134	0.387301	1.52148
	LRRN3	54674	leucine rich repeat neuronal 3	35.1296	-0.617019	0.27854	-2.21519	0.0267471	0.387301	-1.5337
	OSBPL10	114884	oxysterol binding protein-like 10	1223.49	0.398761	0.180085	2.21429	0.0268087	0.387301	1.31838
	STK38L	23012	serine/threonine kinase 38 like	911.797	0.416215	0.187942	2.2146	0.0267878	0.387301	1.33442
	CA11	770	carbonic anhydrase XI	765.666	0.40186	0.181638	2.21242	0.0269374	0.388348	1.32121
	SOCS5	9655	suppressor of cytokine signaling 5	639.328	0.397609	0.179699	2.21264	0.0269226	0.388348	1.31732
	SLC1A4	6509	solute carrier family 1 (glutamate/neutral amino acid transporter), member 4	3551.69	0.471539	0.213286	2.21083	0.0270473	0.389559	1.38659
	RSAD2	91543	radical S-adenosyl methionine domain containing 2	1300.5	0.610489	0.276309	2.20944	0.0271439	0.390577	1.52678
	TCF12	6938	transcription factor 12	1662.56	0.425951	0.192862	2.20857	0.0272042	0.39107	1.34346
	IRF7	3665	interferon regulatory factor 7	4592.07	0.583054	0.264407	2.20514	0.0274445	0.394148	1.49802
	ABHD17C	58489	abhydrolase domain containing 17C	1604.56	-0.366995	0.166758	-2.20076	0.027753	0.397602	-1.28966
	HCP5	10866	HLA complex P5 (non-protein coding)	2546.48	0.422137	0.191803	2.20089	0.0277437	0.397602	1.33991
	NS3BP	NA	NA	183.35	-0.61169	0.277965	-2.2006	0.0277642	0.397602	-1.52805
